# Supplementary material
Source: PubMed Central journal article supplement (PMC7141608)
Supplement: NIHMS1560700-supplement-Supplementary_Material.pdf [file NIHMS1560700-supplement-Supplementary_Material.pdf]

**Supporting information for:**  
**a-ARM: Automatic Rhodopsin Modeling with**  
**Ionization State Selection, Counter-ion**  
**Placement and Chromophore Cavity Generation**

Laura Pedraza-González,<sup>†</sup> Luca De Vico,<sup>†</sup> María del Carmen Marín,<sup>†</sup> Francesca  
Fanelli,<sup>‡</sup> and Massimo Olivucci<sup>\*,†,¶</sup>

<sup>†</sup>*Department of Biotechnologies, Chemistry and Pharmacy, Università degli Studi di Siena,  
via A. Moro 2, I-53100 Siena, Italy*

<sup>‡</sup>*Department of Life Sciences, Center for Neuroscience and Neurotechnology, Università  
degli Studi di Modena e Reggio Emilia, I-41125 Modena, Italy*

<sup>¶</sup>*Department of Chemistry, Bowling Green State University, Bowling Green, Ohio 43403,  
United States of America*

E-mail: [olivucci@unisi.it](mailto:olivucci@unisi.it)

Phone: +(39) 0577-234274

## Contents

|                                                                                                                  |    |
|------------------------------------------------------------------------------------------------------------------|----|
| List of Figures                                                                                                  | S3 |
| List of Tables                                                                                                   | S4 |
| S1 Details on the automation limits of the original ARM protocol in terms of<br>the preparation of the ARM input | S5 |

|                                                                                                                                |            |
|--------------------------------------------------------------------------------------------------------------------------------|------------|
| <b>S2 Workflow of the <math>\alpha</math>-ARM protocol</b>                                                                     | <b>S8</b>  |
| <b>S3 Detailed workflow of each step for the <math>\alpha</math>-ARM automatic input generation</b>                            | <b>S9</b>  |
| S3.1 Step 1. Automatic identification of the protein chain, rPSB, chromophore bounded<br>Lys, MC and SC . . . . .              | S9         |
| S3.2 Step 2: Automatic generation of the chromophore cavity . . . . .                                                          | S10        |
| S3.3 Step 3: Automatic assignment of ionization states . . . . .                                                               | S11        |
| S3.4 Step 4: Automatic counter-ion placement . . . . .                                                                         | S12        |
| <b>S4 Automatic format conversion from LYR to RET plus LYS</b>                                                                 | <b>S13</b> |
| <b>S5 Features of the <math>\alpha</math>-ARM QM/MM Models</b>                                                                 | <b>S14</b> |
| <b>S6 Summary of the ARM QM/MM calculations</b>                                                                                | <b>S17</b> |
| <b>S7 Details of the employed comparative modelling protocol for AARh, PoXeR,<br/>    hMeOp, mMeOp and BCone, GCone, RCone</b> | <b>S26</b> |
| <b>S8 Further details on the assignment of ionizable residues protonation state</b>                                            | <b>S28</b> |
| <b>S9 Notes</b>                                                                                                                | <b>S29</b> |
| <b>References</b>                                                                                                              | <b>S30</b> |

## List of Figures

|    |                                                                                                                                                                                                                                                                                                                                                                 |     |
|----|-----------------------------------------------------------------------------------------------------------------------------------------------------------------------------------------------------------------------------------------------------------------------------------------------------------------------------------------------------------------|-----|
| S1 | Automatic Rhodopsin Modeling workflow. The new version ( <i>a</i> -ARM) incorporates the original version of the ARM protocol further described in ref. S1. In ARM, $N$ independent simulated annealing (SA) and molecular dynamics (MD) room-temperature relaxations are performed at the MM level using GROMACS on the cavity and the Lys-QM systems. . . . . | S8  |
| S2 | Step 1. Initial preparation of the input file. The red filled boxes represent tasks in which the user may interact with the program. . . . .                                                                                                                                                                                                                    | S9  |
| S3 | Step 2. Automatic generation of chromophore cavity. The code does not require the user's interaction during its execution. . . . .                                                                                                                                                                                                                              | S10 |
| S4 | Step 3. Automatic assignment of ionization states. The red filled boxes represent tasks in which the user may interact with the program. . . . .                                                                                                                                                                                                                | S11 |
| S5 | Step 4. Automatic selection of counter-ion placement. The code does not require the user's interaction during its execution. . . . .                                                                                                                                                                                                                            | S12 |

## List of Tables

|    |                                                                                                                                                                                                                                                                                                                                                                                                                                                                                                                                                           |     |
|----|-----------------------------------------------------------------------------------------------------------------------------------------------------------------------------------------------------------------------------------------------------------------------------------------------------------------------------------------------------------------------------------------------------------------------------------------------------------------------------------------------------------------------------------------------------------|-----|
| S1 | Correspondence between atom names in RET and LYR residues. The atom name of LYR and Lys covalently linked to the rPSB are consistent. . . . .                                                                                                                                                                                                                                                                                                                                                                                                             | S13 |
| S2 | Main features of the <i>a</i> -ARM QM/MM models for the rhodopsins in the benchmark set. . . . .                                                                                                                                                                                                                                                                                                                                                                                                                                                          | S14 |
| S3 | Summary of the ten <i>a</i> -ARM QM/MM calculations performed for the rhodopsins in the benchmark set. Computed total ground state ( $S_0$ ) and first excitation ( $S_1$ ) energies, transition oscillator strength ( $f_{Osc}$ ), first vertical excitation energy ( $\Delta E_{S_1-S_0}$ ) and maximum absorption wavelength ( $\lambda_{max}^a$ ). Statistical parameters such as average ( $\bar{N}$ ), difference between calculated and experimental data ( $ \bar{N} $ ) and standard deviation ( $\sigma_{\bar{N}}$ ) are also provided. . . . . | S17 |
| S4 | Trend deviation factor ( $  \text{Trend Dev.}  $ ) for the <i>a</i> -ARM <sub>default</sub> and <i>a</i> -ARM <sub>customized</sub> approaches, expressed as mean absolute error (MAE) and mean absolute deviation (MAD) of the x=38 rhodopsins of the benchmark set. . . . .                                                                                                                                                                                                                                                                             | S25 |
| S5 | Main features of the comparative models . . . . .                                                                                                                                                                                                                                                                                                                                                                                                                                                                                                         | S27 |

# S1 Details on the automation limits of the original ARM protocol in terms of the preparation of the ARM input

**Initial setup of the working PDB file** (⌚  $\approx$  30 min)

- S1.1. The initial template, which is an X-ray structure or a comparative model in PDB format, is cleaned by manual deletion of the lines carrying irrelevant information, so as to extract the information associated with the coordinates of the residues belonging to the QM/MM model. For instance, the selection of the **opsin chain** is handled by manually removing the information on all other chains different from chain A. After this procedure, the **Atom serial number** and the **Residue sequence number** are not consecutive. So, those numerations are fixed manually by checking and changing each row of the template PDB file.
- S1.2. There is not a standard procedure to identify and select **rotamers** of a residue. Therefore, for each template structure, the identification of rotamers is made by searching manually residues with non standard four letters (instead of standard three-letter abbreviation) **Residue name**. For instance, in the case of the 1XIO<sup>S2</sup> template, there are two different rotamers for the Lys 210 with **Residue name** ALys and BLys, and two different rotamers for the Retinal with **Residue name** ARET and BRET. This procedure is time demanding and error prone, since for each new model the user must do manually this search considering all 20 standard amino acids and, additionally, the retinal protonated Schiff base (rPSB) chromophore.
- S1.3. The selection of the rPSB is done manually, assuming the Retinal as default. Therefore, the information of the RET residue is kept, whereas the information of all other non standard residues (i.e. ions and membrane lipids) is removed by manually deleting the corresponding lines in the file.
- S1.4. The selection of the Lys residue covalently linked to the rPSB, the primary (MC) and

secondary (SC) counter-ions is made by visual inspection.

### **Generation of the cavity file (⌚ ≈ 15 min)**

S1.5. The generation of the `cavity` file is performed by using the CASTp<sup>S3</sup> web-server. Thus, the general procedure for acquiring the ARM cavity file is: i) Upload the PDB file on the web-server page; ii) Submit the job and wait some time for the calculation; iii) Visualize the different pockets and select the one which contains both the rPSB and its linked Lys residue; iv) Write (manually) a list with the residues forming the cavity; v) Generate (manually) the cavity file. This procedure is time demanding and error prone due to the writing of the residues list.

### **Assignment of ionization states (⌚ ≈ 45 min)**

S1.6. The ionization state of the residue side-chains is assigned through the calculation of their  $pK_a$  values and burying percentage, by manually launching the PROPKA3.1<sup>S4</sup> software on the current PDB file. The results contained in the PROPKA output file are then analyzed by doing (manually) a series of operations. These involve manually checking if the difference between the calculated ( $pK_a^{Calc}$ ) and model ( $pK_a^{Model}$ )  $pK_a$  values of each amino acid is higher than a shift value (usually 1.5 or 2.0), and if the burying percentage is higher than 55%. However, notice that there is no general consensus for the shift and burying values. Additionally, once the side-chains whose ionization state has to be changed are identified, such change (Asp → ASH, Glu → GLH, His → {HID, HIE, HIP}, Lys → LYD) is done by manually modifying the `Residue name` in the current PDB file.

### **Counter-ion placement (⌚ ≈ 180 min)**

S1.7. The addition of both  $Cl^-$  and  $Na^+$  external counter-ions is necessary to obtain a globally neutral model. The corresponding procedure (Figure 3 in the main text) is handled by a series of manual steps which are time demanding and ambiguous (*i.e.*, subject to the personal user choice):

- S1.7.i. Open the working PDB file in a molecular visualization software and identify the rPSB, the covalently linked Lys residue, the MC and the SC.
- S1.7.ii. Define -visually- the inner (IS) and outer (OS) surfaces of the protein, based on the positions of both the chromophore and its covalently linked Lys residue. It is difficult (and not rigorous) to establish, visually, a correct criteria to define the border between the IS and the OS.
- S1.7.iii. Identify (visually) the positively (Arg, Lys, His) and negatively (Asp, Glu) charged amino acids in the IS and OS of the protein. For instance, if a residue side-chain is above the Lys-QM subsystem it is counted as a IS side-chain, otherwise it is counted as a OS side-chain. Write (manually) a list with the number of positively and negatively charged residues in each protein surface.
- S1.7.iv. Sum (manually) the number of IS and OS positive and negative side-chains of the list to calculate the charge in each region, in order to determine the number of  $\text{Cl}^-$  and  $\text{Na}^+$  external counter-ions to be added.
- S1.7.v. Identify (visually) the target residue side-chains near to which place the counter-ions. Place manually the  $\text{Cl}^-$  and  $\text{Na}^+$  ions (using a visualization software), save their coordinates in a new PDB file. Open the working PDB and the new PDB file in a text editor and add manually the coordinates of the counter-ion to the working PDB file using the correct format.
- S1.7.vi. Open the modified working PDB file to verify the correct placement of the inserted counter-ions.

## S2 Workflow of the *a*-ARM protocol

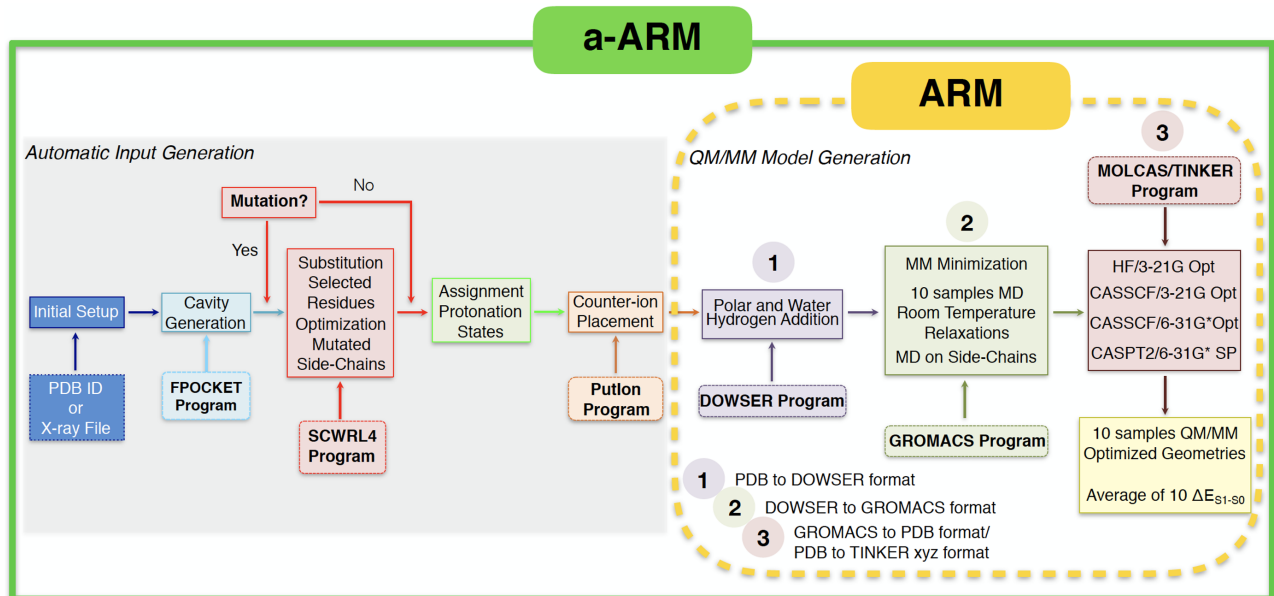

Figure S1: Automatic Rhodopsin Modeling workflow. The new version (*a*-ARM) incorporates the original version of the ARM protocol further described in ref. S1. In ARM,  $N$  independent simulated annealing (SA) and molecular dynamics (MD) room-temperature relaxations are performed at the MM level using GROMACS on the cavity and the Lys-QM systems.



### S3 Detailed workflow of each step for the $\alpha$ -ARM automatic input generation

#### S3.1 Step 1. Automatic identification of the protein chain, rPSB, chromophore bounded Lys, MC and SC

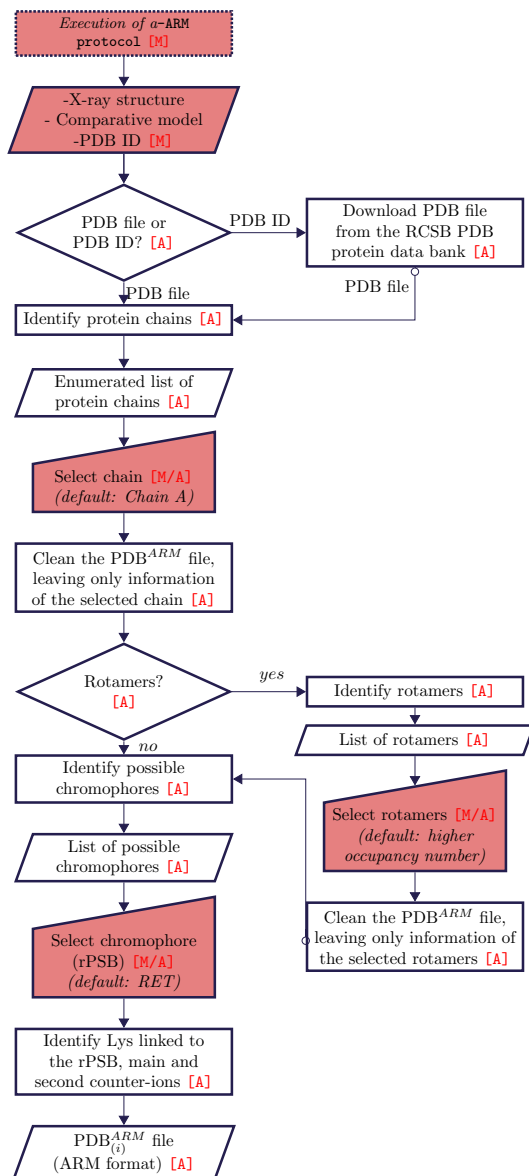

Figure S2: Step 1. Initial preparation of the input file. The red filled boxes represent tasks in which the user may interact with the program.

## S3.2 Step 2: Automatic generation of the chromophore cavity

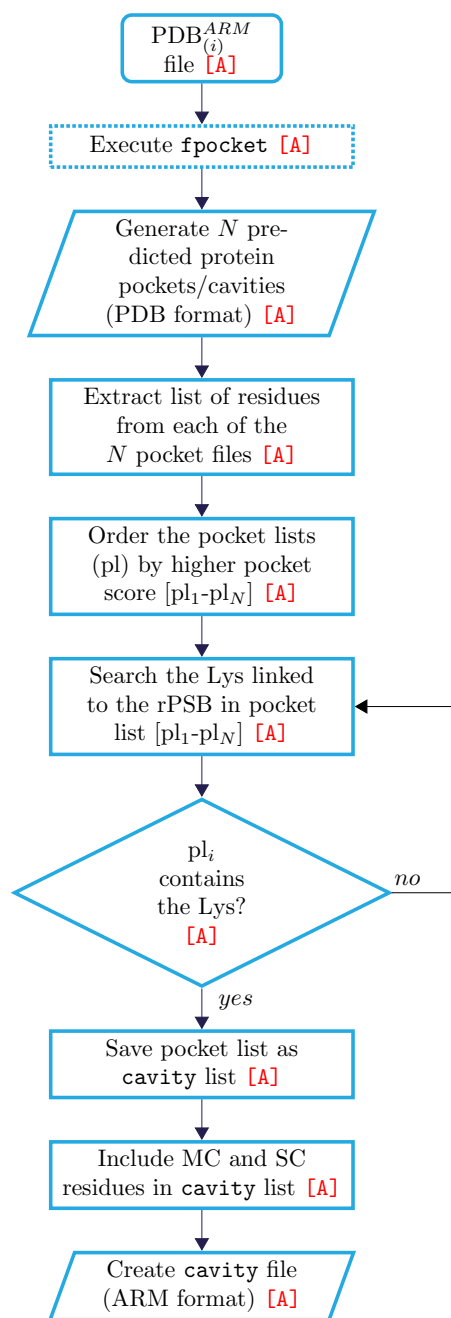

Figure S3: Step 2. Automatic generation of chromophore cavity. The code does not require the user's interaction during its execution.

### S3.3 Step 3: Automatic assignment of ionization states

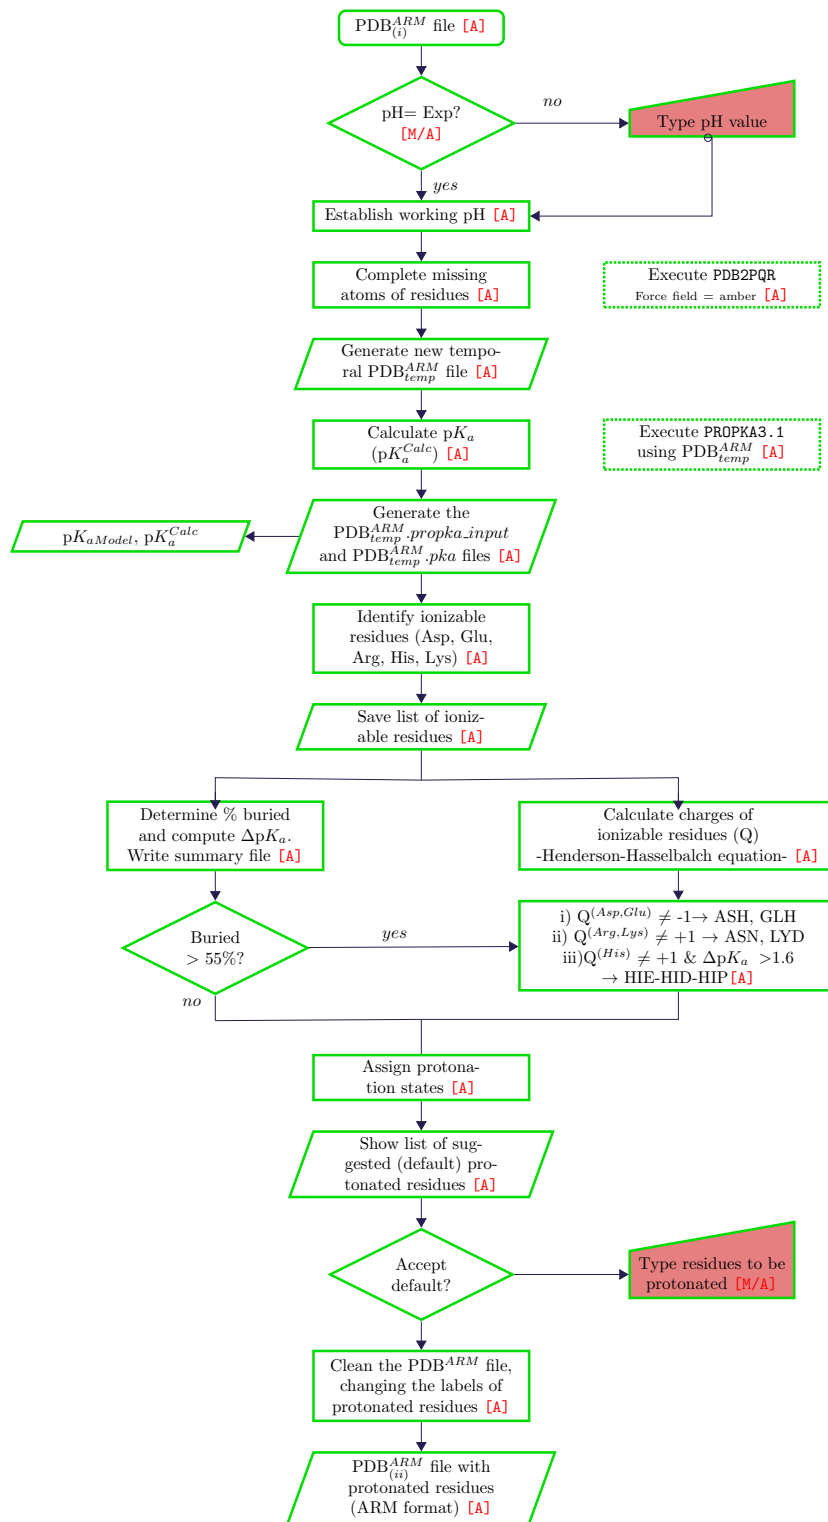

Figure S4: Step 3. Automatic assignment of ionization states. The red filled boxes represent tasks in which the user may interact with the program.

### S3.4 Step 4: Automatic counter-ion placement

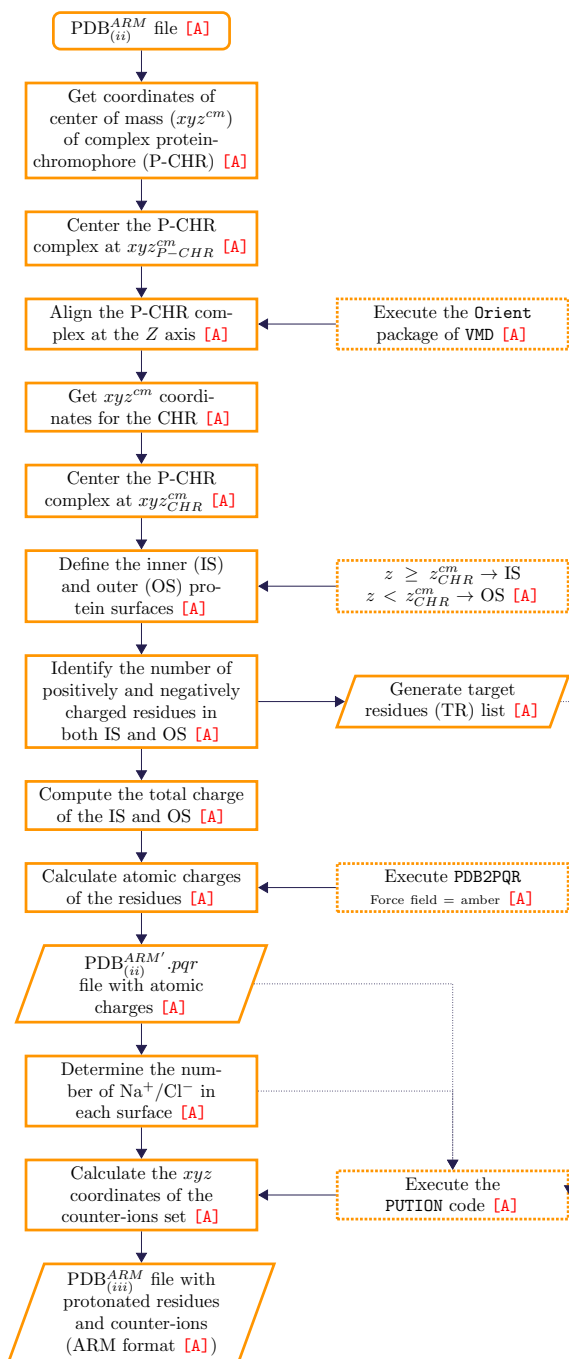

Figure S5: Step 4. Automatic selection of counter-ion placement. The code does not require the user's interaction during its execution.

## S4 Automatic format conversion from LYR to RET plus LYS

Table S1: Correspondence between atom names in RET and LYR residues. The atom name of LYR and Lys covalently linked to the rPSB are consistent.

| RET | LYR |
|-----|-----|
| C1  | C17 |
| C2  | C16 |
| C3  | C15 |
| C4  | C14 |
| C5  | C12 |
| C6  | C11 |
| C7  | C10 |
| C8  | C9  |
| C9  | C80 |
| C10 | C7  |
| C11 | C6  |
| C12 | C5  |
| C13 | C3  |
| C14 | C2  |
| C15 | C1  |
| C16 | C18 |
| C17 | C19 |
| C18 | C13 |
| C19 | C8  |
| C20 | C4  |

# S5 Features of the $\alpha$ -ARM QM/MM Models

Table S2: Main features of the  $\alpha$ -ARM QM/MM models for the rhodopsins in the benchmark set.

| Protein code                                     | PBD ID (Chain)                | Res. <sup>a</sup> (Å) | Retinal conf. <sup>b</sup> | Linker Lysine | MC <sup>c</sup> | SC      | Rotamers                                          | pH           | Protonated residues                                  | $\alpha$ -ARM QM/MM models |                              | Cavity residues <sup>e</sup>                                                                                                          |
|--------------------------------------------------|-------------------------------|-----------------------|----------------------------|---------------|-----------------|---------|---------------------------------------------------|--------------|------------------------------------------------------|----------------------------|------------------------------|---------------------------------------------------------------------------------------------------------------------------------------|
|                                                  |                               |                       |                            |               |                 |         |                                                   |              |                                                      | OS <sup>d</sup>            | Counter-ions IS <sup>d</sup> |                                                                                                                                       |
| <b><math>\alpha</math>-ARM<sub>default</sub></b> |                               |                       |                            |               |                 |         |                                                   |              |                                                      |                            |                              |                                                                                                                                       |
| <b>ASR<sub>AT-1</sub></b>                        | 1XIO <sup>S2</sup><br>(A)     | 2.0                   | all- <i>trans</i>          | 210           | Asp-75          | —       | BRET<br>ALys-210(0.50)                            | 5.6          | ASH(198,217), GLH(36),<br>HID(8,69)                  | 2 Na <sup>+</sup>          | 7 Cl <sup>-</sup>            | 73,75,76,79,80,83,109,112,113,116,119,132,135,<br>136,139,176,179,180,183,198,202,209,210                                             |
| <b>ASR<sub>AT-2</sub></b>                        | 1XIO <sup>S2</sup><br>(A)     | 2.0                   | all- <i>trans</i>          | 210           | Asp-75          | —       | BRET<br>BLys-210(0.50)                            | 5.6          | ASH(198,217), GLH(36),<br>HID(8,69)                  | 2 Na <sup>+</sup>          | 7 Cl <sup>-</sup>            | 75,76,79,80,83,109,112,113,132,135,136,139,<br>176,179,180,183,198,202,209,210                                                        |
| <b>ASR<sub>13C-1</sub></b>                       | 1XIO <sup>S2</sup><br>(A)     | 2.0                   | 13- <i>cis</i>             | 210           | Asp-75          | —       | ARET<br>ALys-210(0.50)                            | 5.6          | ASH(198,217), GLH(36),<br>HID(8,69)                  | 2 Na <sup>+</sup>          | 7 Cl <sup>-</sup>            | 73,75,76,79,80,83,109,112,113,116,132,135,136,<br>139,176,179,180,183,198,202,209,210                                                 |
| <b>ASR<sub>13C-2</sub></b>                       | 1XIO <sup>S2</sup><br>(A)     | 2.0                   | 13- <i>cis</i>             | 210           | Asp-75          | —       | ARET<br>BLys-210(0.50)                            | 5.6          | ASH(198,217), GLH(36),<br>HID(8,69)                  | 2 Na <sup>+</sup>          | 7 Cl <sup>-</sup>            | 73,75,76,79,80,83,109,112,113,116,132,135,136,<br>139,176,179,180,183,198,202,209,210                                                 |
| <b>bR<sub>AT</sub></b>                           | 6G7H <sup>S5</sup><br>(A)     | 1.5                   | all- <i>trans</i>          | 216           | Asp-212         | Asp-85  | AAsp-104(0.80)<br>ALeu-15(0.57)<br>ALeu-109(0.54) | 5.6          | ASH(85,96,115)<br>GLH(194)                           | 1 Cl <sup>-</sup>          | 1 Cl <sup>-</sup>            | 83,85,86,90,93,118,119,121,122,125,137,138,141,<br>142,145,182,185,186,189,212,215,216                                                |
| <b>bR<sub>13C</sub></b>                          | 1X0S <sup>S6</sup><br>(A)     | 2.5                   | 13- <i>cis</i>             | 216           | Asp-212         | Asp-85  | —                                                 | 5.2          | ASH(85,96,115)<br>GLH(194)                           | 1 Cl <sup>-</sup>          | 3 Cl <sup>-</sup>            | 83,85,86,90,93,118,119,121,122,125,134,137,138,<br>141,142,145,182,185,186,189,208,212,215,216                                        |
| <b>bathoRh</b>                                   | 2G87 <sup>S7</sup><br>(A)     | 2.6                   | all- <i>trans</i>          | 296           | Glu-113         | Glu-181 | —                                                 | 2.6          | ASH(83) HID(211)<br>GLH(122,181,249)                 | 2 Na <sup>+</sup>          | 7 Cl <sup>-</sup>            | 86,91,113,114,117,118,121,122,125,167,181,186,<br>187,188,189,191,207,208,211,212,216,261,265,268,<br>269,272,292,295,296,298         |
| <b>BPR</b>                                       | 4JQ6 <sup>S8</sup><br>(A)     | 2.3                   | all- <i>trans</i>          | 213           | Asp-79          | Asp-209 | —                                                 | 4.5          | GLH(90,124)                                          | 4 Na <sup>+</sup>          | 3 Cl <sup>-</sup>            | 77,79,80,83,84,87,113,116,117,120,133,134,137,<br>138,141,180,183,184,187,205,209,212,213                                             |
| <b>ChR<sub>C1C2</sub></b>                        | 3UG9 <sup>S9</sup><br>(A)     | 2.3                   | all- <i>trans</i>          | 296           | Asp-292         | Glu-162 | —                                                 | 6.0          | ASH(195), GLH(121,122,<br>129,136,274), HID(173,288) | 3 Cl <sup>-</sup>          | 6 Cl <sup>-</sup>            | 162,163,166,167,170,195,198,199,202,216,217, 220,<br>221,224,225,227,228,229,262,265,266,269,<br>292,295,296                          |
| <b>Rh</b>                                        | 1U19 <sup>S10</sup><br>(A)    | 2.2                   | 11- <i>cis</i>             | 296           | Glu-113         | Glu-181 | —                                                 | 6.0          | ASH(83) HID(211)<br>GLH(122,181)                     | 2 Na <sup>+</sup>          | 6 Cl <sup>-</sup>            | 86,91,113,114,117,118,121,122,125,181,186,187,<br>188,189,191,207,208,211,212,216,261,265,266,<br>268,269,272,292,295,296,298         |
| <b>SqRh</b>                                      | 2Z73 <sup>S11</sup><br>(A)    | 2.5                   | 11- <i>cis</i>             | 305           | Glu-180         | —       | —                                                 | 6.6          | ASH(80), HID(319)                                    | 1 Cl <sup>-</sup>          | 7 Cl <sup>-</sup>            | 80,83,87,111,112,115,116,119,120,123,177,180,<br>186,187,188,204,205,208,209,270,274,277,278,<br>281,301,304,305                      |
| <b>hMeOp</b>                                     | T: 2Z73 <sup>S11</sup><br>(A) | 2.5                   | 11- <i>cis</i>             | 274           | Glu-149         | —       | —                                                 | 6.6          | ASH(50), HID(288,279)                                | 1 Cl <sup>-</sup>          | 15 Cl <sup>-</sup>           | 53,57,78,81,84,85,88,89,92,95,136,146,149,155,<br>156,157,169,173,174,177,178,181,182,185,236,239,<br>240,243,244,246,247,270,273,274 |
| <b>ASR<sub>AT-D217E</sub></b>                    | 4TL3 <sup>S12</sup><br>(A)    | 2.3                   | all- <i>trans</i>          | 210           | 75              | —       | —                                                 | 5.6          | ASH(198,217), GLH(36),<br>HID(8)                     | —                          | 7 Cl <sup>-</sup>            | 73,75,76,79,80,83,109,112,113,116,119,131,132,135,<br>136,139,176,179,180,183,198,202,209,210                                         |
| <b>Arch1</b>                                     | 1UAZ <sup>S13</sup><br>(A)    | 3.4                   | all- <i>trans</i>          | 222           | Asp-91          | Asp-218 | —                                                 | 5.2          | ASH(91,102,121),<br>GLH(210)                         | 3 Na <sup>+</sup>          | 4 Cl <sup>-</sup>            | 55,89,91,92,95,96,99,102,121,124,125,127,128,<br>131,143,144,147,148,151,183,184,187,188,191,<br>192,195,214,218,221,222,225          |
| <b>Arch2</b>                                     | 3WQJ <sup>S14</sup><br>(A)    | 1.8                   | all- <i>trans</i>          | 221           | Asp-90          | Asp-217 | —                                                 | 7.0          | ASH(90,101,120),<br>GLH(209)                         | 3 Na <sup>+</sup>          | 5 Cl <sup>-</sup>            | 88,90,91,95,98,123,124,127,146,147,150,187,<br>190,191,194,213,217,220,221                                                            |
| <b>ChR2</b>                                      | 6EID <sup>S15</sup><br>(A)    | 2.4                   | all- <i>trans</i>          | 257           | Glu-123         | Asp-253 | —                                                 | —<br>def=7.4 | GLH(90,101), HID(134,249)                            | 2 Cl <sup>-</sup>          | 9 Cl <sup>-</sup>            | 121,123,124,128,131,156,159,160,163,164,177,<br>178,181,182,185,186,188,189,223,224,226,227,<br>230,253,256,257                       |
| <b>ChR2-C128T</b>                                | 6EIG <sup>S15</sup><br>(A)    | 2.7                   | all- <i>trans</i>          | 257           | Glu-123         | Asp-253 | —                                                 | —<br>def=7.4 | GLH(90,101), HID(134,249)                            | 0 Cl <sup>-</sup>          | 7 Cl <sup>-</sup>            | 121,123,124,128,131,156,159,160,163,164,177,<br>178,181,182,185,186,188,189,223,224,226,227,<br>230,253,256,257                       |
| <b>KR2-1</b>                                     | 3X3C <sup>S16</sup><br>(A)    | 2.3                   | all- <i>trans</i>          | 255           | Asp-116         | Asp-251 | AAsp-116(0.65)<br>AGln-157(0.5)                   | 8.0          | —                                                    | 8 Na <sup>+</sup>          | 8 Cl <sup>-</sup>            | 110,113,116,117,120,149,150,153,171,174,175,<br>178,215,218,219,222,251,254,255                                                       |
| <b>KR2-2</b>                                     | 3X3C <sup>S16</sup><br>(A)    | 2.3                   | all- <i>trans</i>          | 255           | Asp-116         | Asp-251 | AAsp-116(0.65)<br>BGLn-157(0.5)                   | 8.0          | —                                                    | 8 Na <sup>+</sup>          | 8 Cl <sup>-</sup>            | 110,113,116,117,120,149,150,153,167,168,171,<br>172,174,175,178,215,218,219,222,223,247,251,                                          |

<sup>a</sup>X-Ray diffraction resolution. <sup>b</sup> Retinal conformation. <sup>c</sup>Main (MC) and second (SC) counter-ions. <sup>d</sup>Extracellular (OS) and Intracellular (IS) protein surfaces. <sup>e</sup>In bold Lys, MC and SC.

Table S2 — continued from previous page

| Protein code                           | PBD ID (Chain)                | Res. <sup>a</sup> (Å) | Retinal conf. <sup>b</sup> | Linker Lysine | MC <sup>c</sup> | SC      | a-ARM QM/MM models                                |                 |                                                                          |              |                    |                              |                                                                                                                                                                                                                                                    |
|----------------------------------------|-------------------------------|-----------------------|----------------------------|---------------|-----------------|---------|---------------------------------------------------|-----------------|--------------------------------------------------------------------------|--------------|--------------------|------------------------------|----------------------------------------------------------------------------------------------------------------------------------------------------------------------------------------------------------------------------------------------------|
|                                        |                               |                       |                            |               |                 |         | Rotamers                                          | pH              | Protonated residues                                                      | Counter-ions |                    | Cavity residues <sup>e</sup> |                                                                                                                                                                                                                                                    |
|                                        |                               |                       |                            |               |                 |         | OS <sup>d</sup>                                   | IS <sup>d</sup> |                                                                          |              |                    |                              |                                                                                                                                                                                                                                                    |
| <b>NM-R3</b>                           | 5B2N <sup>S17</sup><br>(A)    | 1.6                   | all-trans                  | 235           | Cl <sup>-</sup> | Asp-231 | —                                                 | 8.0             | —                                                                        |              | 7 Na <sup>+</sup>  | 7 Cl <sup>-</sup>            | <b>254,255</b><br>2,3,5,6,29,75,76,85,87,88,89,90,91,92,93,94,<br>96,97,99,103,106,135,136,139,140,143,144,<br>146,153,154,157,158,160,161,164,201,204,<br>205,208,209,223,227, <b>231,234,235</b>                                                 |
| <b>CIR</b>                             | 5G28 <sup>S18</sup><br>(A)    | 1.6                   | all-trans                  | 235           | Cl <sup>-</sup> | Asp-231 | —                                                 | 6.0             | —                                                                        |              | 6 Na <sup>+</sup>  | 7 Cl <sup>-</sup>            | 3,5,91,92,95,96,99,103,106,135,136,139,143,<br>146,153,154,157,158,160,161,164,201,204,205,<br>207,208,209,223,227, <b>231,234,235,403</b>                                                                                                         |
| <b>SR-II</b>                           | 1JGJ <sup>S19</sup><br>(A)    | 2.4                   | all-trans                  | 205           | Asp-201         | Asp-75  | —                                                 | 5.3             | ASH(75,193)                                                              |              | 2 Cl <sup>-</sup>  | 1 Cl <sup>-</sup>            | 73, <b>75</b> ,76,77,80,83,108,109,112,126,127,130,<br>131,134,171,174,175,178, <b>197,201,204,205</b>                                                                                                                                             |
| <b>SqbathoRh</b>                       | 3AYM <sup>S20</sup>           | 2.8                   | all-trans                  | 305           | 180             | —       | —                                                 | 6.6             | ASH(80), HID(319)                                                        |              | 1 Cl <sup>-</sup>  | 7 Cl <sup>-</sup>            | 80,83,87,111,112,115,116,119,120,177, <b>180</b> ,<br>186,187,188,204,205,209,270,274,277,<br>278,301,304, <b>305</b>                                                                                                                              |
| <b>AARh</b>                            | T:1U19 <sup>S10</sup><br>(A)  | 2.2                   | 11-cis                     | 296           | 113             | 181     | —                                                 | 6.0             | ASH(83), HID(211)<br>GLH(122,181)                                        |              | 2 Na <sup>+</sup>  | 7 Cl <sup>-</sup>            | 86, <b>113</b> ,114,117,118,121,122,125,167, <b>181</b> ,<br>186,187,188,189,191,207,208,211,212,261,<br>265,268,269,272,292,295, <b>296,298</b>                                                                                                   |
| <b>BCone</b>                           | T:1U19 <sup>S10</sup><br>(A)  | 2.2                   | 11-cis                     | 293           | Glu-110         | Glu-178 | —                                                 | 6.0             | GLH(178)                                                                 |              | 10 Cl <sup>-</sup> | 5 Cl <sup>-</sup>            | 52,75,76,79,80,82,83, <b>110</b> ,111,113,114,115,116,<br>117,118,119,120,121,122,123,125,158, <b>178,184</b> ,<br>185,186,188,204,205,208,209,212,213,216,217,<br>255,258,259,262,263,265,266,267,269,270,289,<br>292, <b>293,295,296,299,300</b> |
| <b>GCone</b>                           | T:1U19 <sup>S10</sup><br>(A)  | 2.2                   | 11-cis                     | 312           | Glu-129         | Glu-102 | —                                                 | 6.0             | ASH(99), GLH(102,150),<br>HID(197), LYD(200)                             |              | 5 Cl <sup>-</sup>  | 11 Cl <sup>-</sup>           | <b>129</b> ,130,133,134,137,138,141,184,192,194,197,<br>202,203,204,205,206,207,216,219,220,223,224,<br>227,228,277,278,281,282,284,285,288,289,292,<br>308,311, <b>312</b>                                                                        |
| <b>RCone</b>                           | T:1U19 <sup>S10</sup><br>(A)  | 2.2                   | 11-cis                     | 293           | Glu-110         | Glu-83  | —                                                 | 6.0             | ASH(80), GLH(83),<br>HID(178)                                            |              | 4 Cl <sup>-</sup>  | 11 Cl <sup>-</sup>           | 41,44,48, <b>83</b> ,84,87,88, <b>110</b> ,111,114,115,117,118,<br>119,122,164,178,183,184,185,186,188,189,201,<br>204,205,208,209,210,213,258,259,262,263,265,<br>266,268,269,270,271,272,273,275,280,284,285,<br>288,289,292, <b>293,295,296</b> |
| <b>mMeOp</b>                           | T: 2Z73 <sup>S11</sup><br>(A) | 2.5                   | 11-cis                     | 283           | Glu-160         | —       | —                                                 | 6.6             | ASH (61), HID(297)                                                       |              | 1 Cl <sup>-</sup>  | 17 Cl <sup>-</sup>           | 22,25,26,61,64,65,68,69,91,92,95,96,99,100,<br>103,157, <b>160</b> ,166,167,168,180,184,185,188,<br>189,248,252,253,255,256,279,282, <b>283,286</b>                                                                                                |
| <b>PoXeR<sub>AT</sub></b>              | T:1XIO <sup>S2</sup><br>(A)   | 2.0                   | all-trans                  | 209           | Asp-74          | Asp-108 | —                                                 | 5.6             | ASH(108,216), GLH(35)                                                    |              | 2 Na <sup>+</sup>  | 6 Cl <sup>-</sup>            | 72, <b>74</b> ,75,79,82, <b>108</b> ,111,112,115,118,130,<br>131,134,135,138,175,178,179,182,201,208, <b>209</b>                                                                                                                                   |
| <b>PoXeR<sub>13C</sub></b>             | T:1XIO <sup>S2</sup><br>(A)   | 2.0                   | all-trans                  | 209           | Asp-74          | Asp-108 | —                                                 | 5.6             | ASH(108,216), GLH(35)                                                    |              | 2 Na <sup>+</sup>  | 6 Cl <sup>-</sup>            | 72,74,75,78,79,82, <b>108</b> ,111,112,115,118,<br>130,131,134,135,138,175,178,179,182,201,208, <b>209</b>                                                                                                                                         |
| <b>a-ARM<sub>customized</sub></b>      |                               |                       |                            |               |                 |         |                                                   |                 |                                                                          |              |                    |                              |                                                                                                                                                                                                                                                    |
| <b>KR2-2<sup>(c)</sup></b>             | 3X3C <sup>S16</sup><br>(A)    | 2.3                   | all-trans                  | 255           | Asp-116         | Asp-251 | AAsp-116(0.65)<br>BGLn-157(0.5)                   | 8.0             | ASH(251)                                                                 |              | 7 Na <sup>+</sup>  | 8 Cl <sup>-</sup>            | 110,113, <b>116</b> ,117,120,149,150,153,167,168,171,<br>172,174,175,178,215,218,219,222,223,247, <b>251</b> ,<br>254, <b>255</b>                                                                                                                  |
| <b>BPR<sup>(c)</sup></b>               | 4JQ6 <sup>S8</sup><br>(A)     | 2.3                   | all-trans                  | 213           | 79              | 209     | —                                                 | 4.5             | GLH(90)                                                                  |              | 4 Na <sup>+</sup>  | 1 Cl <sup>-</sup>            | 77, <b>79</b> ,80,83,84,87,116,117,120,133,134,137,138,<br>141,180,183,184,187,205, <b>209,212,213</b>                                                                                                                                             |
| <b>RCone<sup>(c)</sup></b>             | T:1U19 <sup>S10</sup><br>(A)  | 2.2                   | 11-cis                     | 293           | Glu-110         | Glu-83  | —                                                 | 6               | ASH(80), GLH(110),<br>HID(178)                                           |              | 4 Cl <sup>-</sup>  | 10 Cl <sup>-</sup>           | 41,44,48, <b>83</b> ,84,87,88, <b>110</b> ,111,114,115,117,118,<br>119,122,164,178,183,184,185,186,188,189,<br>201,204,205,208,209,210,213,258,259,262,<br>263,265,266,268,269,270,271,272,273,275,<br>280,284,285,288,289,292, <b>293,295,296</b> |
| <b>bR<sub>AT</sub><sup>(c)</sup></b>   | 6G7H <sup>S5</sup><br>(A)     | 1.5                   | all-trans                  | 216           | 85              | 212     | AAsp-104(0.80)<br>ALeu-15(0.57)<br>ALeu-109(0.54) | 5.6             | ASH(212,96,115)<br>GLH(194)                                              |              | 1 Cl <sup>-</sup>  | 1 Cl <sup>-</sup>            | 83, <b>85</b> ,86,90,93,118,119,121,122,125,137,138,<br>141,142,145,182,185,186,189, <b>212,215,216</b>                                                                                                                                            |
| <b>bR<sub>AT</sub><sup>(c-2)</sup></b> | 6G7H <sup>S5</sup><br>(A)     | 1.5                   | all-trans                  | 216           | 85              | 212     | AAsp-104(0.80)<br>ALeu-15(0.57)<br>ALeu-109(0.54) | 5.6             | ASH(212,96,115)<br>GLH(194)                                              |              | 1 Cl <sup>-</sup>  | 1 Cl <sup>-</sup>            | 83, <b>85</b> ,86,90,93, <b>96,115</b> ,118,119,121,122,125,<br>137,138,141,142,145,182,185,186,189, <b>212</b> ,<br>215, <b>216</b>                                                                                                               |
| <b>ChR<sub>C1C2</sub><sup>c</sup></b>  | 3UG9 <sup>S9</sup><br>(A)     | 2.3                   | all-trans                  | 296           | 292             | 162     | —                                                 | 5.2             | ASH(195), GLH(121,122,<br>220,221,129,136,140,162,274),<br>HID(173, 288) |              | 5 Cl <sup>-</sup>  | 6 Cl <sup>-</sup>            | <b>162</b> ,163,166,167,170,195,198,199,202,216,217,<br>224,225,227,228,229,262,265,266,<br>269, <b>292,295,296</b>                                                                                                                                |
| <b>ChR2<sup>(c)</sup></b>              | 6EID <sup>S15</sup><br>(A)    | 2.4                   | all-trans                  | 257           | Glu-123         | Asp-253 | —                                                 | 5.2             | ASH(156,253),GLH(83,90,<br>def=7.4 101),HID(134,249)                     |              | 5 Cl <sup>-</sup>  | 10 Cl <sup>-</sup>           | 90,121, <b>123</b> ,124,128,131,156,159,160,163,164,177,<br>178,181,182,185,186,188,189,223,224,226,227,                                                                                                                                           |

<sup>a</sup>X-Ray diffraction resolution. <sup>b</sup> Retinal conformation. <sup>c</sup>Main (MC) and second (SC) counter-ions. <sup>d</sup> Extracellular (OS) and Intracellular (IS) protein surfaces. <sup>e</sup> In bold Lys, MC and SC.

Continued on next page

Table S2 — continued from previous page

| Protein code                                               | PBD ID (Chain)             | Res. <sup>a</sup> (Å) | Retinal conf. <sup>b</sup> | Linker Lysine | MC <sup>c</sup> | SC      | Rotamers                                          | pH             | Protonated residues                                | a-ARM QM/MM models |                              | Cavity residues <sup>e</sup>                                                                                                                                          |
|------------------------------------------------------------|----------------------------|-----------------------|----------------------------|---------------|-----------------|---------|---------------------------------------------------|----------------|----------------------------------------------------|--------------------|------------------------------|-----------------------------------------------------------------------------------------------------------------------------------------------------------------------|
|                                                            |                            |                       |                            |               |                 |         |                                                   |                |                                                    | OS <sup>d</sup>    | Counter-ions IS <sup>d</sup> |                                                                                                                                                                       |
| <b>ChR2-C128T<sup>(c)</sup></b>                            | 6EIG <sup>S15</sup><br>(A) | 2.7                   | all- <i>trans</i>          | 257           | Glu-123         | Asp-253 | –                                                 | 5.2<br>def=7.4 | ASH(156,253), GLH(82,90,235), 97,101, HID(134,249) | 4 Cl <sup>-</sup>  | 8 Cl <sup>-</sup>            | 230, <b>253</b> ,256, <b>257</b><br>121, <b>123</b> ,124,128,131,156,159,160,163,164,177,178,181,182,185,186,188,189,223,224,226,227,230, <b>253</b> ,256, <b>257</b> |
| <b>a-ARM<sub>customized</sub> (Effect of chain and pH)</b> |                            |                       |                            |               |                 |         |                                                   |                |                                                    |                    |                              |                                                                                                                                                                       |
| <b>ASR<sub>AT</sub>-1<sup>(c-pH)</sup></b>                 | 1XIO <sup>S2</sup><br>(A)  | 2.0                   | all- <i>trans</i>          | 210           | 75              | –       | BRET<br>ALys-210                                  | 7.4            | GLH(36),<br>HID(8,69)                              | 3 Na <sup>+</sup>  | 6 Cl <sup>-</sup>            | 73, <b>75</b> ,76,79,80,83,109,112,113,116,119,132,135,136,139,176,179,180,183,198,202,209, <b>210</b>                                                                |
| <b>ASR<sub>13C</sub>-2<sup>(c-pH)</sup></b>                | 1XIO <sup>S2</sup><br>(A)  | 2.0                   | all- <i>trans</i>          | 210           | 75              | –       | ARET<br>BLys-210                                  | 7.4            | GLH(36),<br>HID(8,69)                              | 3 Na <sup>+</sup>  | 6 Cl <sup>-</sup>            | 73, <b>75</b> ,76,79,80,83,109,112,113,116,119,131,132,135,136,139,176,179,180,183,198,202,209, <b>210</b>                                                            |
| <b>bR<sub>13C</sub><sup>c-pH</sup></b>                     | 1XOS <sup>S6</sup><br>(A)  | 2.5                   | 13- <i>cis</i>             | 216           | 85              | 212     | –                                                 | 7.4            | ASH(96)<br>GLH(194)                                | 1 Na <sup>+</sup>  | 3 Cl <sup>-</sup>            | 83, <b>85</b> ,86,90,93,118,119,121,122,125,134,137,138,141,142,145,182,185,186,189,208, <b>212</b> ,215, <b>216</b>                                                  |
| <b>bR<sub>AT</sub><sup>c-pH</sup></b>                      | 6G7H <sup>S5</sup><br>(A)  | 1.5                   | all- <i>trans</i>          | 216           | 85              | 212     | AAsp-104(0.80)<br>ALeu-15(0.57)<br>ALeu-109(0.54) | 7.4            | ASH(96)<br>GLH(194)                                | 1 Cl <sup>-</sup>  | 1 Na <sup>+</sup>            | 83, <b>85</b> ,86,90,93,118,119,121,122,125,137,138,141,142,145,182,185,186,189, <b>212</b> ,215, <b>216</b>                                                          |
| <b>bathoRh<sup>(c-pH)</sup></b>                            | 2G87 <sup>S7</sup><br>(A)  | 7.4                   | all- <i>trans</i>          | 296           | 113             | 181     | –                                                 | 6.0            | ASH(83) HID(211)<br>GLH(122,181)                   | 2 Na <sup>+</sup>  | 6 Cl <sup>-</sup>            | 86,91, <b>113</b> ,114,117,118,121,122,125,167, <b>181</b> ,186,187,188,189,191,207,208,211,212,216,261,265,268,269,272,292,295, <b>296</b> ,298                      |
| <b>bathoRh<sup>(c)</sup></b>                               | 2G87 <sup>S7</sup><br>(B)  | 2.6                   | all- <i>trans</i>          | 296           | 113             | 181     | –                                                 | 6.0            | ASH(83) HID(211)<br>GLH(122,181)                   | 2 Na <sup>+</sup>  | 6 Cl <sup>-</sup>            | 86,91, <b>113</b> ,114,117,118,121,122,125,167, <b>181</b> ,186,187,188,189,191,207,208,211,212,216,261,265,268,269,272,292,295, <b>296</b> ,298                      |
| <b>BPR<sup>(c-2)</sup></b>                                 | 4JQ6 <sup>S8</sup><br>(B)  | 2.3                   | all- <i>trans</i>          | 213           | 79              | 209     | –                                                 | 4.5            | GLH(90)                                            | 4 Na <sup>+</sup>  | 3 Cl <sup>-</sup>            | 77, <b>79</b> ,80,83,84,87,113,116,117,120,133,134,137,138,141,180,183,184,187,205, <b>209</b> ,212, <b>213</b>                                                       |
| <b>BPR<sup>(c-pH-2)</sup></b>                              | 4JQ6 <sup>S8</sup><br>(B)  | 2.3                   | all- <i>trans</i>          | 213           | 79              | 209     | –                                                 | 4.5            | GLH(90)                                            | 5 Na <sup>+</sup>  | 3 Cl <sup>-</sup>            | 77, <b>79</b> ,80,83,84,87,113,116,117,120,133,134,137,138,141,180,183,184,187,205, <b>209</b> ,212, <b>213</b>                                                       |
| <b>Rh<sup>(c)</sup></b>                                    | 1U19 <sup>S10</sup><br>(B) | 2.2                   | 11- <i>cis</i>             | 296           | 113             | 181     | –                                                 | 6.0            | ASH(83) HID(211)<br>GLH(122,181)                   | 2 Na <sup>+</sup>  | 6 Cl <sup>-</sup>            | 83,86,91, <b>113</b> ,114,117,118,121,122,125, <b>181</b> ,186,187,188,189,191,207,208,211,212,216,261,265,268,269,272,292,295, <b>296</b> ,298                       |
| <b>Rh<sup>(c-pH-2)</sup></b>                               | 1U19 <sup>S10</sup><br>(B) | 2.2                   | 11- <i>cis</i>             | 296           | 113             | 181     | –                                                 | 6.0            | ASH(83) HID(211)<br>GLH(122)                       | 3 Na <sup>+</sup>  | 6 Cl <sup>-</sup>            | 83,86,91, <b>113</b> ,114,117,118,121,122,125, <b>181</b> ,186,187,188,189,191,207,208,211,212,216,261,265,268,269,272,292,295, <b>296</b> ,298                       |
| <b>SqRh<sup>c</sup></b>                                    | 2Z73 <sup>S11</sup><br>(B) | 2.5                   | 11- <i>cis</i>             | 305           | 180             | –       | –                                                 | 6.6            | ASH(80), HID(319)                                  | 1 Cl <sup>-</sup>  | 7 Cl <sup>-</sup>            | 80,83,87,111,112,115,116,119,120,123,177, <b>180</b> ,186,187,188,204,205,209,270,274,277,278,281, <b>305</b>                                                         |

<sup>a</sup>X-Ray diffraction resolution. <sup>b</sup> Retinal conformation. <sup>c</sup>Main (MC) and second (SC) counter-ions. <sup>d</sup>Extracellular (OS) and Intracellular (IS) protein surfaces. <sup>e</sup>In bold Lys, MC and SC.



# S6 Summary of the ARM QM/MM calculations

Table S3: Summary of the ten  $a$ -ARM QM/MM calculations performed for the rhodopsins in the benchmark set. Computed total ground state ( $S_0$ ) and first excitation ( $S_1$ ) energies, transition oscillator strength ( $f_{Osc}$ ), first vertical excitation energy ( $\Delta E_{S_1-S_0}$ ) and maximum absorption wavelength ( $\lambda_{max}^a$ ). Statistical parameters such as average ( $\bar{N}$ ), difference between calculated and experimental data ( $|\bar{N}|$ ) and standard deviation ( $\sigma_{\bar{N}}$ ) are also provided.

| Seed<br>( $N$ )                             | $S_0$ Energy<br>(a.u.) | $S_1$ Energy<br>(a.u.) | $f_{Osc}$ | $\Delta E_{S_1-S_0}$<br>(kcal/mol) | $\lambda_{max}^a$<br>(nm) | $S_0$ Energy<br>(a.u.)    | $S_1$ Energy<br>(a.u.) | $f_{Osc}$ | $\Delta E_{S_1-S_0}$<br>(kcal/mol) | $\lambda_{max}^a$<br>(nm) | $S_0$ Energy<br>(a.u.)     | $S_1$ Energy<br>(a.u.) | $f_{Osc}$ | $\Delta E_{S_1-S_0}$<br>(kcal/mol) | $\lambda_{max}^a$<br>(nm) |
|---------------------------------------------|------------------------|------------------------|-----------|------------------------------------|---------------------------|---------------------------|------------------------|-----------|------------------------------------|---------------------------|----------------------------|------------------------|-----------|------------------------------------|---------------------------|
| <b><math>a</math>-ARM<sub>default</sub></b> |                        |                        |           |                                    |                           |                           |                        |           |                                    |                           |                            |                        |           |                                    |                           |
| <b>ASR<sub>AT-1</sub></b>                   |                        |                        |           |                                    |                           | <b>ASR<sub>AT-2</sub></b> |                        |           |                                    |                           | <b>ASR<sub>13C-1</sub></b> |                        |           |                                    |                           |
| Exp.                                        |                        |                        |           | 52.0                               | 550                       |                           |                        |           | 52.0                               | 550                       |                            |                        |           | 53.2                               | 537                       |
| 1                                           | -871.944185            | -871.858715            | 1.18      | 53.6                               | 533                       | -871.856669               | -871.769865            | 1.20      | 54.5                               | 525                       | -871.971106                | -871.883658            | 1.04      | 54.9                               | 521                       |
| 2                                           | -871.933753            | -871.852485            | 1.35      | 51.0                               | 561                       | -871.844720               | -871.759667            | 1.50      | 53.4                               | 536                       | -871.967357                | -871.878575            | 1.07      | 55.7                               | 513                       |
| 3                                           | -871.933966            | -871.852626            | 1.37      | 51.0                               | 560                       | -871.845887               | -871.761754            | 1.33      | 52.8                               | 542                       | -871.971365                | -871.883857            | 1.02      | 54.9                               | 521                       |
| 4                                           | -871.944074            | -871.858426            | 1.20      | 53.7                               | 532                       | -871.844557               | -871.751744            | 1.01      | 58.2                               | 491                       | -871.970919                | -871.883975            | 1.03      | 54.6                               | 524                       |
| 5                                           | -871.935622            | -871.854422            | 1.34      | 51.0                               | 561                       | -871.849651               | -871.767147            | 1.35      | 51.8                               | 552                       | -871.967134                | -871.878920            | 1.06      | 55.4                               | 517                       |
| 6                                           | -871.933380            | -871.852472            | 1.35      | 50.8                               | 563                       | -871.845719               | -871.761747            | 1.33      | 52.7                               | 543                       | -871.973374                | -871.887370            | 1.00      | 54.0                               | 530                       |
| 7                                           | -871.944236            | -871.858925            | 1.36      | 53.5                               | 534                       | -871.863471               | -871.776729            | 1.19      | 54.4                               | 525                       | -871.971356                | -871.884159            | 1.02      | 54.7                               | 523                       |
| 8                                           | -871.944192            | -871.858789            | 1.19      | 53.6                               | 534                       | -871.854097               | -871.772424            | 1.36      | 51.2                               | 558                       | -871.967466                | -871.879496            | 1.06      | 55.2                               | 518                       |
| 9                                           | -871.933903            | -871.852946            | 1.23      | 50.8                               | 563                       | -871.845296               | -871.759678            | 1.34      | 53.7                               | 532                       | -871.967513                | -871.879555            | 1.06      | 55.2                               | 518                       |
| 10                                          | -871.926741            | -871.841506            | 1.36      | 53.5                               | 535                       | -871.847536               | -871.756189            | 0.94      | 57.3                               | 499                       | -871.966980                | -871.878895            | 1.06      | 55.3                               | 517                       |
| $\bar{N}$                                   |                        |                        |           | 52.3                               | 548                       |                           |                        |           | 54.0                               | 530                       |                            |                        |           | 55.0                               | 520                       |
| $ \bar{N} $                                 |                        |                        |           | 0.3                                | -2                        |                           |                        |           | 2.0                                | -20                       |                            |                        |           | 1.8                                | -17                       |
| $\sigma_{\bar{N}}$                          |                        |                        |           | 1.4                                | 15                        |                           |                        |           | 2.2                                | 21                        |                            |                        |           | 0.5                                | 5                         |
| <b><math>b</math>-ARM<sub>default</sub></b> |                        |                        |           |                                    |                           |                           |                        |           |                                    |                           |                            |                        |           |                                    |                           |
| <b>ASR<sub>13C-2</sub></b>                  |                        |                        |           |                                    |                           | <b>bR<sub>AT</sub></b>    |                        |           |                                    |                           | <b>bR<sub>13C</sub></b>    |                        |           |                                    |                           |
| Exp.                                        |                        |                        |           | 53.2                               | 537                       |                           |                        |           | 50.3                               | 568                       |                            |                        |           | 52.2                               | 547                       |
| 1                                           | -871.957306            | -871.870880            | 1.08      | 54.2                               | 527                       | -871.767543               | -871.682740            | 1.25      | 53.2                               | 537                       | -871.603497                | -871.518338            | 0.92      | 53.4                               | 535                       |
| 2                                           | -871.957423            | -871.870771            | 1.08      | 54.4                               | 526                       | -871.767442               | -871.682983            | 1.24      | 53.0                               | 539                       | -871.603873                | -871.519224            | 0.94      | 53.1                               | 538                       |
| 3                                           | -871.957467            | -871.871043            | 1.08      | 54.2                               | 527                       | -871.767725               | -871.682885            | 1.25      | 53.2                               | 537                       | -871.604253                | -871.519692            | 0.96      | 53.1                               | 539                       |
| 4                                           | -871.956444            | -871.871834            | 1.08      | 53.1                               | 539                       | -871.767713               | -871.682729            | 1.25      | 53.3                               | 536                       | -871.603550                | -871.518503            | 0.93      | 53.4                               | 536                       |
| 5                                           | -871.957499            | -871.870947            | 1.08      | 54.3                               | 526                       | -871.767371               | -871.682922            | 1.24      | 53.0                               | 540                       | -871.604049                | -871.519412            | 0.95      | 53.1                               | 538                       |
| 6                                           | -871.957305            | -871.870681            | 1.09      | 54.4                               | 526                       | -871.767501               | -871.682631            | 1.25      | 53.3                               | 537                       | -871.603728                | -871.518714            | 0.93      | 53.3                               | 536                       |
| 7                                           | -871.956807            | -871.869975            | 1.09      | 54.5                               | 525                       | -871.767560               | -871.682855            | 1.24      | 53.2                               | 538                       | -871.603783                | -871.518817            | 0.94      | 53.3                               | 536                       |
| 8                                           | -871.957236            | -871.870434            | 1.08      | 54.5                               | 525                       | -871.767651               | -871.683245            | 1.25      | 53.0                               | 540                       | -871.604010                | -871.519093            | 0.94      | 53.3                               | 537                       |
| 9                                           | -871.951108            | -871.864478            | 1.03      | 54.4                               | 526                       | -871.767701               | -871.682689            | 1.25      | 53.3                               | 536                       | -871.603528                | -871.518515            | 0.92      | 53.3                               | 536                       |
| 10                                          | -871.956932            | -871.870643            | 1.08      | 54.1                               | 528                       | -871.767647               | -871.683130            | 1.25      | 53.0                               | 539                       | -871.603293                | -871.518417            | 0.94      | 53.3                               | 537                       |
| $\bar{N}$                                   |                        |                        |           | 54.2                               | 528                       |                           |                        |           | 53.2                               | 538                       |                            |                        |           | 53.3                               | 537                       |
| $ \bar{N} $                                 |                        |                        |           | 1.0                                | -10                       |                           |                        |           | 2.9                                | -30                       |                            |                        |           | 1.1                                | -10                       |
| $\sigma_{\bar{N}}$                          |                        |                        |           | 0.4                                | 4                         |                           |                        |           | 0.1                                | 2                         |                            |                        |           | 0.1                                | 1                         |

Continued on next page

Table S3 — continued from previous page

| Seed<br>( $N$ )    | $S_0$ Energy<br>(a.u.) | $S_1$ Energy<br>(a.u.) | $f_{Osc}$ | $\Delta E_{S1-S0}$<br>(kcal/mol) | $\lambda_{max}^a$<br>(nm) | $S_0$ Energy<br>(a.u.) | $S_1$ Energy<br>(a.u.) | $f_{Osc}$ | $\Delta E_{S1-S0}$<br>(kcal/mol) | $\lambda_{max}^a$<br>(nm) | $S_0$ Energy<br>(a.u.) | $S_1$ Energy<br>(a.u.) | $f_{Osc}$ | $\Delta E_{S1-S0}$<br>(kcal/mol) | $\lambda_{max}^a$<br>(nm) |
|--------------------|------------------------|------------------------|-----------|----------------------------------|---------------------------|------------------------|------------------------|-----------|----------------------------------|---------------------------|------------------------|------------------------|-----------|----------------------------------|---------------------------|
| <b>bathoRh</b>     |                        |                        |           |                                  |                           | <b>BPR</b>             |                        |           |                                  |                           | <b>Rh</b>              |                        |           |                                  |                           |
| Exp.               |                        |                        |           | <i>54.0</i>                      | <i>529</i>                |                        |                        |           | <i>58.3</i>                      | <i>490</i>                |                        |                        |           | <i>57.4</i>                      | <i>498</i>                |
| 1                  | -871.796873            | -871.707343            | 0.98      | 56.2                             | 509                       | -872.092199            | -871.990725            | 0.58      | 63.7                             | 449                       | -871.891394            | -871.799897            | 0.84      | 57.4                             | 498                       |
| 2                  | -871.796733            | -871.706755            | 0.96      | 56.5                             | 506                       | -872.092759            | -871.991196            | 0.58      | 63.7                             | 449                       | -871.891409            | -871.799801            | 0.83      | 57.5                             | 497                       |
| 3                  | -871.797014            | -871.707182            | 0.97      | 56.4                             | 507                       | -872.092370            | -871.990778            | 0.57      | 63.7                             | 448                       | -871.898920            | -871.807462            | 0.86      | 57.4                             | 498                       |
| 4                  | -871.796624            | -871.707482            | 0.96      | 55.9                             | 511                       | -872.091715            | -871.990006            | 0.62      | 63.8                             | 448                       | -871.899099            | -871.806950            | 0.88      | 57.8                             | 494                       |
| 5                  | -871.796767            | -871.706736            | 0.96      | 56.5                             | 506                       | -872.093278            | -871.991460            | 0.60      | 63.9                             | 447                       | -871.892134            | -871.800452            | 0.87      | 57.5                             | 497                       |
| 6                  | -871.797696            | -871.709396            | 0.94      | 55.4                             | 516                       | -872.091774            | -871.990248            | 0.57      | 63.7                             | 449                       | -871.891939            | -871.799669            | 0.88      | 57.9                             | 494                       |
| 7                  | -871.796909            | -871.707454            | 0.97      | 56.1                             | 509                       | -872.092212            | -871.990614            | 0.56      | 63.8                             | 448                       | -871.904687            | -871.810782            | 0.97      | 58.9                             | 485                       |
| 8                  | -871.796941            | -871.707383            | 0.97      | 56.2                             | 509                       | -872.102907            | -872.000990            | 0.56      | 64.0                             | 447                       | -871.900020            | -871.809660            | 0.89      | 56.7                             | 504                       |
| 9                  | -871.833285            | -871.743574            | 0.95      | 56.3                             | 508                       | -872.092288            | -871.990441            | 0.57      | 63.9                             | 447                       | -871.898517            | -871.807389            | 0.85      | 57.2                             | 500                       |
| 10                 | -871.803384            | -871.713400            | 0.96      | 56.5                             | 506                       | -872.089566            | -871.988996            | 0.47      | 63.1                             | 453                       | -871.913411            | -871.819366            | 0.84      | 59.0                             | 484                       |
| $\bar{N}$          |                        |                        |           | 56.2                             | 509                       |                        |                        |           | 63.7                             | 449                       |                        |                        |           | 57.7                             | 495                       |
| $ \bar{N} $        |                        |                        |           | 2.2                              | -20                       |                        |                        |           | 5.4                              | -42                       |                        |                        |           | 0.3                              | -3                        |
| $\sigma_{\bar{N}}$ |                        |                        |           | 0.3                              | 3                         |                        |                        |           | 0.2                              | 2                         |                        |                        |           | 0.7                              | 6                         |
| <b>SqRh</b>        |                        |                        |           |                                  |                           | <b>hMeOp</b>           |                        |           |                                  |                           | <b>Arch1</b>           |                        |           |                                  |                           |
| Exp.               |                        |                        |           | <i>58.5</i>                      | <i>489</i>                |                        |                        |           | <i>60.4</i>                      | <i>473</i>                |                        |                        |           | <i>50.3</i>                      | <i>568</i>                |
| 1                  | -871.781252            | -871.684407            | 0.80      | 60.8                             | 470                       | -871.853694            | -871.759998            | 0.82      | 58.8                             | 486                       | -872.150995            | -872.071861            | 1.21      | 49.7                             | 576                       |
| 2                  | -871.780822            | -871.684020            | 0.80      | 60.7                             | 471                       | -871.869263            | -871.770231            | 0.82      | 62.1                             | 460                       | -872.134891            | -872.056149            | 1.24      | 49.4                             | 579                       |
| 3                  | -871.781270            | -871.684471            | 0.79      | 60.7                             | 471                       | -871.868814            | -871.769820            | 0.82      | 62.1                             | 460                       | -872.136583            | -872.053532            | 1.17      | 52.1                             | 549                       |
| 4                  | -871.781391            | -871.684430            | 0.81      | 60.8                             | 470                       | -871.868208            | -871.773950            | 0.79      | 59.1                             | 483                       | -872.138577            | -872.059637            | 1.22      | 49.5                             | 577                       |
| 5                  | -871.781655            | -871.684338            | 0.80      | 61.1                             | 468                       | -871.863313            | -871.764403            | 0.76      | 62.1                             | 461                       | -872.146883            | -872.062362            | 1.12      | 53.0                             | 539                       |
| 6                  | -871.781443            | -871.684495            | 0.81      | 60.8                             | 470                       | -871.874067            | -871.773095            | 0.80      | 63.4                             | 451                       | -872.134260            | -872.054198            | 1.22      | 50.2                             | 569                       |
| 7                  | -871.794665            | -871.697108            | 0.79      | 61.2                             | 467                       | -871.874090            | -871.779508            | 0.78      | 59.4                             | 482                       | -872.134575            | -872.053348            | 1.25      | 51.0                             | 561                       |
| 8                  | -871.780941            | -871.684046            | 0.79      | 60.8                             | 470                       | -871.869458            | -871.770278            | 0.81      | 62.2                             | 459                       | -872.140807            | -872.061822            | 1.24      | 49.6                             | 577                       |
| 9                  | -871.784194            | -871.687478            | 0.79      | 60.7                             | 471                       | -871.862633            | -871.764304            | 0.79      | 61.7                             | 463                       | -872.138292            | -872.058605            | 1.22      | 50.0                             | 572                       |
| 10                 | -871.780898            | -871.683688            | 0.80      | 61.0                             | 469                       | -871.862633            | -871.764304            | 0.79      | 61.7                             | 463                       | -872.137357            | -872.057714            | 1.37      | 50.0                             | 572                       |
| $\bar{N}$          |                        |                        |           | 60.9                             | 470                       |                        |                        |           | 61.3                             | 467                       |                        |                        |           | 50.5                             | 567                       |
| $ \bar{N} $        |                        |                        |           | 2.4                              | -19                       |                        |                        |           | 0.9                              | -6                        |                        |                        |           | 0.1                              | -1                        |
| $\sigma_{\bar{N}}$ |                        |                        |           | 0.2                              | 1                         |                        |                        |           | 1.6                              | 12                        |                        |                        |           | 1.2                              | 13                        |
| <b>Arch2</b>       |                        |                        |           |                                  |                           | <b>KR2-1</b>           |                        |           |                                  |                           | <b>KR2-2</b>           |                        |           |                                  |                           |
| Exp.               |                        |                        |           | <i>52.0</i>                      | <i>550</i>                |                        |                        |           | <i>54.5</i>                      | <i>525</i>                |                        |                        |           | <i>54.5</i>                      | <i>525</i>                |
| 1                  | -871.742904            | -871.656377            | 1.22      | 54.3                             | 527                       | -871.718190            | -871.605973            | 1.41      | 70.4                             | 406                       | -871.881846            | -871.771102            | 1.40      | 69.5                             | 411                       |
| 2                  | -871.761918            | -871.673860            | 1.20      | 55.3                             | 517                       | -871.718749            | -871.608831            | 1.48      | 69.0                             | 415                       | -871.881184            | -871.771286            | 1.44      | 69.0                             | 415                       |
| 3                  | -871.762079            | -871.675040            | 1.23      | 54.6                             | 523                       | -871.718610            | -871.608609            | 1.47      | 69.0                             | 414                       | -871.855753            | -871.742680            | 1.39      | 71.0                             | 403                       |
| 4                  | -871.762469            | -871.675202            | 1.23      | 54.8                             | 522                       | -871.744476            | -871.633994            | 1.46      | 69.3                             | 412                       | -871.855530            | -871.742981            | 1.40      | 70.6                             | 405                       |
| 5                  | -871.761993            | -871.674503            | 1.22      | 54.9                             | 521                       | -871.718288            | -871.605364            | 1.45      | 70.9                             | 403                       | -871.882383            | -871.771524            | 1.40      | 69.6                             | 411                       |
| 6                  | -871.761602            | -871.675097            | 1.23      | 54.3                             | 527                       | -871.722030            | -871.612339            | 1.50      | 68.8                             | 415                       | -871.880793            | -871.770146            | 1.42      | 69.4                             | 412                       |
| 7                  | -871.762087            | -871.674610            | 1.23      | 54.9                             | 521                       | -871.720750            | -871.610400            | 1.47      | 69.2                             | 413                       | -871.882213            | -871.771985            | 1.42      | 69.2                             | 413                       |
| 8                  | -871.760968            | -871.675668            | 1.28      | 53.5                             | 534                       | -871.718202            | -871.605145            | 1.43      | 70.9                             | 403                       | -871.882437            | -871.772269            | 1.42      | 69.1                             | 414                       |
| 9                  | -871.761597            | -871.674473            | 1.22      | 54.7                             | 523                       | -871.718346            | -871.605827            | 1.45      | 70.6                             | 405                       | -871.882394            | -871.772118            | 1.41      | 69.2                             | 413                       |
| 10                 | -871.761788            | -871.676601            | 1.28      | 53.5                             | 535                       | -871.718550            | -871.605579            | 1.44      | 70.9                             | 403                       | -871.884082            | -871.773926            | 1.42      | 69.1                             | 414                       |
| $\bar{N}$          |                        |                        |           | 54.5                             | 525                       |                        |                        |           | 69.9                             | 409                       |                        |                        |           | 69.6                             | 411                       |
| $ \bar{N} $        |                        |                        |           | 2.5                              | -25                       |                        |                        |           | 15.4                             | -116                      |                        |                        |           | 15.1                             | -114                      |
| $\sigma_{\bar{N}}$ |                        |                        |           | 0.6                              | 6                         |                        |                        |           | 0.9                              | 5                         |                        |                        |           | 0.7                              | 4                         |

Continued on next page

Table S3 — continued from previous page

| Seed<br>( <i>N</i> )      | S <sub>0</sub> Energy<br>(a.u.) | S <sub>1</sub> Energy<br>(a.u.) | <i>f</i> <sub>OSc</sub> | Δ <i>E</i> <sub>S1-S0</sub><br>(kcal/mol) | λ <sup><i>a</i></sup> <sub>max</sub><br>(nm) | S <sub>0</sub> Energy<br>(a.u.) | S <sub>1</sub> Energy<br>(a.u.) | <i>f</i> <sub>OSc</sub> | Δ <i>E</i> <sub>S1-S0</sub><br>(kcal/mol) | λ <sup><i>a</i></sup> <sub>max</sub><br>(nm) | S <sub>0</sub> Energy<br>(a.u.) | S <sub>1</sub> Energy<br>(a.u.) | <i>f</i> <sub>OSc</sub> | Δ <i>E</i> <sub>S1-S0</sub><br>(kcal/mol) | λ <sup><i>a</i></sup> <sub>max</sub><br>(nm) |
|---------------------------|---------------------------------|---------------------------------|-------------------------|-------------------------------------------|----------------------------------------------|---------------------------------|---------------------------------|-------------------------|-------------------------------------------|----------------------------------------------|---------------------------------|---------------------------------|-------------------------|-------------------------------------------|----------------------------------------------|
| <b>NM-R3</b>              |                                 |                                 |                         |                                           |                                              | <b>CIR</b>                      |                                 |                         |                                           |                                              | <b>SR-II</b>                    |                                 |                         |                                           |                                              |
| Exp.                      |                                 |                                 |                         | <i>55.3</i>                               | <i>517</i>                                   |                                 |                                 |                         | <i>55.3</i>                               | <i>517</i>                                   |                                 |                                 |                         | <i>57.5</i>                               | <i>497</i>                                   |
| 1                         | -876.392982                     | -876.303493                     | 1.01                    | 56.2                                      | 509                                          | -873.188913                     | -873.100453                     | 1.03                    | 55.5                                      | 515                                          | -871.779169                     | -871.690861                     | 1.34                    | 55.4                                      | 516                                          |
| 2                         | -876.372855                     | -876.283400                     | 1.01                    | 56.1                                      | 509                                          | -873.182300                     | -873.094205                     | 1.04                    | 55.3                                      | 517                                          | -871.759098                     | -871.666148                     | 1.08                    | 58.3                                      | 490                                          |
| 3                         | -876.372546                     | -876.283065                     | 1.03                    | 56.1                                      | 509                                          | -873.182851                     | -873.095165                     | 1.05                    | 55.0                                      | 520                                          | -871.758769                     | -871.665717                     | 1.11                    | 58.4                                      | 490                                          |
| 4                         | -876.372837                     | -876.283238                     | 1.01                    | 56.2                                      | 509                                          | -873.182582                     | -873.094987                     | 1.06                    | 55.0                                      | 520                                          | -871.763071                     | -871.670262                     | 1.05                    | 58.2                                      | 491                                          |
| 5                         | -876.408427                     | -876.318916                     | 1.01                    | 56.2                                      | 509                                          | -873.182400                     | -873.094480                     | 1.06                    | 55.2                                      | 518                                          | -871.758942                     | -871.666012                     | 1.11                    | 58.3                                      | 490                                          |
| 6                         | -876.370355                     | -876.280882                     | 1.02                    | 56.1                                      | 509                                          | -873.182740                     | -873.095376                     | 1.06                    | 54.8                                      | 522                                          | -871.763904                     | -871.671291                     | 1.07                    | 58.1                                      | 492                                          |
| 7                         | -876.372139                     | -876.282507                     | 1.01                    | 56.2                                      | 508                                          | -873.212629                     | -873.124515                     | 1.04                    | 55.3                                      | 517                                          | -871.763796                     | -871.671999                     | 1.13                    | 57.6                                      | 496                                          |
| 8                         | -876.372005                     | -876.282495                     | 1.03                    | 56.2                                      | 509                                          | -873.181733                     | -873.093633                     | 1.05                    | 55.3                                      | 517                                          | -871.758395                     | -871.665243                     | 1.06                    | 58.5                                      | 489                                          |
| 9                         | -876.373257                     | -876.283571                     | 1.00                    | 56.3                                      | 508                                          | -873.182667                     | -873.095100                     | 1.05                    | 54.9                                      | 520                                          | -871.759259                     | -871.666292                     | 1.12                    | 58.3                                      | 490                                          |
| 10                        | -876.374500                     | -876.284775                     | 1.01                    | 56.3                                      | 508                                          | -873.193237                     | -873.105228                     | 1.04                    | 55.2                                      | 518                                          | -871.759809                     | -871.666608                     | 1.06                    | 58.5                                      | 489                                          |
| $\overline{N}$            |                                 |                                 |                         | 56.2                                      | 509                                          |                                 |                                 |                         | 55.2                                      | 518                                          |                                 |                                 |                         | 58.0                                      | 493                                          |
| $ \overline{N} $          |                                 |                                 |                         | 0.9                                       | -8                                           |                                 |                                 |                         | -0.1                                      | 1                                            |                                 |                                 |                         | 0.5                                       | -4                                           |
| $\sigma_{\overline{N}}$   |                                 |                                 |                         | 0.1                                       | 0                                            |                                 |                                 |                         | 0.2                                       | 2                                            |                                 |                                 |                         | 0.9                                       | 8                                            |
| <b>ChR<sub>C1C2</sub></b> |                                 |                                 |                         |                                           |                                              | <b>ChR2</b>                     |                                 |                         |                                           |                                              | <b>ChR2-C128T</b>               |                                 |                         |                                           |                                              |
| Exp.                      |                                 |                                 |                         | 62.4                                      | 458                                          |                                 |                                 |                         | 60.8                                      | 470                                          |                                 |                                 |                         | 59.0                                      | 485                                          |
| 1                         | -871.870140                     | -871.745569                     | 0.09                    | 78.2                                      | 366                                          | -871.815311                     | -871.691014                     | 1.27                    | 78.0                                      | 367                                          | -871.888276                     | -871.760576                     | 0.06                    | 80.1                                      | 357                                          |
| 2                         | -871.870150                     | -871.744864                     | 0.08                    | 78.6                                      | 364                                          | -871.836024                     | -871.703610                     | 0.12                    | 83.1                                      | 344                                          | -871.880425                     | -871.753332                     | 0.05                    | 79.8                                      | 359                                          |
| 3                         | -871.851757                     | -871.727240                     | 0.09                    | 78.1                                      | 366                                          | -871.812075                     | -871.689091                     | 1.28                    | 77.2                                      | 370                                          | -871.880270                     | -871.754419                     | 0.06                    | 79.0                                      | 362                                          |
| 4                         | -871.869494                     | -871.750353                     | 0.14                    | 74.8                                      | 382                                          | -871.817542                     | -871.685661                     | 0.19                    | 82.8                                      | 345                                          | -871.877818                     | -871.751407                     | 0.06                    | 79.3                                      | 360                                          |
| 5                         | -871.870223                     | -871.746189                     | 0.10                    | 77.8                                      | 367                                          | -871.808973                     | -871.680495                     | 0.30                    | 80.6                                      | 355                                          | -871.880116                     | -871.753757                     | 0.06                    | 79.3                                      | 361                                          |
| 6                         | -871.869556                     | -871.750803                     | 0.15                    | 74.5                                      | 384                                          | -871.811952                     | -871.687923                     | 1.30                    | 77.8                                      | 367                                          | -871.879732                     | -871.752082                     | 0.04                    | 80.1                                      | 357                                          |
| 7                         | -871.870109                     | -871.744002                     | 0.06                    | 79.1                                      | 361                                          | -871.816012                     | -871.684373                     | 0.17                    | 82.6                                      | 346                                          | -871.881191                     | -871.754768                     | 0.05                    | 79.3                                      | 360                                          |
| 8                         | -871.867595                     | -871.753277                     | 0.25                    | 71.7                                      | 399                                          | -871.811320                     | -871.686689                     | 1.26                    | 78.2                                      | 366                                          | -871.878693                     | -871.754416                     | 0.12                    | 78.0                                      | 367                                          |
| 9                         | -871.878344                     | -871.753321                     | 0.08                    | 78.5                                      | 364                                          | -871.811518                     | -871.686410                     | 0.76                    | 78.5                                      | 364                                          | -871.879972                     | -871.753295                     | 0.05                    | 79.5                                      | 360                                          |
| 10                        | -871.870245                     | -871.746581                     | 0.10                    | 77.6                                      | 368                                          | -871.808973                     | -871.680495                     | 0.30                    | 80.6                                      | 355                                          | -871.877364                     | -871.746319                     | 0.04                    | 82.2                                      | 348                                          |
| $\overline{N}$            |                                 |                                 |                         | 76.9                                      | 372                                          |                                 |                                 |                         | 79.9                                      | 358                                          |                                 |                                 |                         | 79.7                                      | 359                                          |
| $ \overline{N} $          |                                 |                                 |                         | 14.5                                      | -86                                          |                                 |                                 |                         | 19.1                                      | -112                                         |                                 |                                 |                         | 20.7                                      | -126                                         |
| $\sigma_{\overline{N}}$   |                                 |                                 |                         | 2.4                                       | 12                                           |                                 |                                 |                         | 2.3                                       | 10                                           |                                 |                                 |                         | 1.1                                       | 5                                            |
| <b>SqbathoRh</b>          |                                 |                                 |                         |                                           |                                              | <b>AARh</b>                     |                                 |                         |                                           |                                              | <b>BCone</b>                    |                                 |                         |                                           |                                              |
| Exp.                      |                                 |                                 |                         | <i>54.0</i>                               | <i>530</i>                                   |                                 |                                 |                         | <i>56.3</i>                               | <i>508</i>                                   |                                 |                                 |                         | <i>66.5</i>                               | <i>430</i>                                   |
| 1                         | -871.748231                     | -871.660335                     | 1.11                    | 55.2                                      | 518                                          | -871.789121                     | -871.695758                     | 0.76                    | 58.6                                      | 488                                          | -872.457790                     | -872.349377                     | 0.64                    | 68.0                                      | 420                                          |
| 2                         | -871.751087                     | -871.662346                     | 1.08                    | 55.7                                      | 513                                          | -871.788471                     | -871.695800                     | 0.80                    | 58.2                                      | 492                                          | -872.456892                     | -872.348952                     | 0.65                    | 67.7                                      | 422                                          |
| 3                         | -871.748516                     | -871.660100                     | 1.09                    | 55.5                                      | 515                                          | -871.787995                     | -871.692800                     | 0.78                    | 59.7                                      | 479                                          | -872.456799                     | -872.348877                     | 0.65                    | 67.7                                      | 422                                          |
| 4                         | -871.748338                     | -871.659719                     | 1.09                    | 55.6                                      | 514                                          | -871.787008                     | -871.693466                     | 0.75                    | 58.7                                      | 487                                          | -872.456879                     | -872.348875                     | 0.65                    | 67.8                                      | 422                                          |
| 5                         | -871.748410                     | -871.659807                     | 1.09                    | 55.6                                      | 514                                          | -871.787422                     | -871.692558                     | 0.78                    | 59.5                                      | 480                                          | -872.456762                     | -872.348799                     | 0.65                    | 67.7                                      | 422                                          |
| 6                         | -871.750155                     | -871.661742                     | 1.07                    | 55.5                                      | 515                                          | -871.788294                     | -871.696173                     | 0.77                    | 57.8                                      | 495                                          | -872.457026                     | -872.348829                     | 0.64                    | 67.9                                      | 421                                          |
| 7                         | -871.748545                     | -871.659990                     | 1.08                    | 55.6                                      | 515                                          | -871.788960                     | -871.695320                     | 0.80                    | 58.8                                      | 487                                          | -872.456634                     | -872.348732                     | 0.65                    | 67.7                                      | 422                                          |
| 8                         | -871.748344                     | -871.660163                     | 1.06                    | 55.3                                      | 517                                          | -871.785832                     | -871.690178                     | 0.95                    | 60.0                                      | 476                                          | -872.458406                     | -872.350480                     | 0.55                    | 67.7                                      | 422                                          |
| 9                         | -871.748545                     | -871.660065                     | 1.09                    | 55.5                                      | 515                                          | -871.786932                     | -871.693274                     | 0.74                    | 58.8                                      | 486                                          | -872.456810                     | -872.348924                     | 0.65                    | 67.7                                      | 422                                          |
| 10                        | -871.748304                     | -871.659689                     | 1.09                    | 55.6                                      | 514                                          | -871.787764                     | -871.692417                     | 0.78                    | 59.8                                      | 478                                          | -872.458263                     | -872.349787                     | 0.64                    | 68.1                                      | 420                                          |
| $\overline{N}$            |                                 |                                 |                         | 55.5                                      | 515                                          |                                 |                                 |                         | 59.0                                      | 485                                          |                                 |                                 |                         | 67.8                                      | 422                                          |
| $ \overline{N} $          |                                 |                                 |                         | 1.6                                       | -15                                          |                                 |                                 |                         | 2.7                                       | -23                                          |                                 |                                 |                         | 1.3                                       | -9                                           |
| $\sigma_{\overline{N}}$   |                                 |                                 |                         | 0.2                                       | 1                                            |                                 |                                 |                         | 0.7                                       | 6                                            |                                 |                                 |                         | 0.1                                       | 1                                            |

Continued on next page

Table S3 — continued from previous page

| Seed<br>( $N$ )           | $S_0$ Energy<br>(a.u.) | $S_1$ Energy<br>(a.u.) | $f_{Osc}$ | $\Delta E_{S1-S0}$<br>(kcal/mol) | $\lambda_{max}^a$<br>(nm) | $S_0$ Energy<br>(a.u.)     | $S_1$ Energy<br>(a.u.) | $f_{Osc}$ | $\Delta E_{S1-S0}$<br>(kcal/mol) | $\lambda_{max}^a$<br>(nm) | $S_0$ Energy<br>(a.u.) | $S_1$ Energy<br>(a.u.) | $f_{Osc}$ | $\Delta E_{S1-S0}$<br>(kcal/mol) | $\lambda_{max}^a$<br>(nm) |
|---------------------------|------------------------|------------------------|-----------|----------------------------------|---------------------------|----------------------------|------------------------|-----------|----------------------------------|---------------------------|------------------------|------------------------|-----------|----------------------------------|---------------------------|
| <b>GCone</b>              |                        |                        |           |                                  |                           | <b>RCone</b>               |                        |           |                                  |                           | <b>mMeOp</b>           |                        |           |                                  |                           |
| Exp.                      |                        |                        |           | <i>53.4</i>                      | <i>535</i>                |                            |                        |           | <i>49.7</i>                      | <i>575</i>                |                        |                        |           | <i>61.2</i>                      | <i>467</i>                |
| 1                         | -871.823983            | -871.738519            | 0.96      | 53.6                             | 533                       | -871.878069                | -871.784867            | 0.82      | 58.5                             | 489                       | -871.885083            | -871.786096            | 0.77      | 62.1                             | 460                       |
| 2                         | -871.820043            | -871.730651            | 0.77      | 56.1                             | 510                       | -871.879581                | -871.782602            | 0.70      | 60.9                             | 470                       | -871.865266            | -871.765590            | 0.77      | 62.5                             | 457                       |
| 3                         | -871.823720            | -871.735980            | 0.82      | 55.1                             | 519                       | -871.869267                | -871.782100            | 0.78      | 54.7                             | 523                       | -871.873858            | -871.774306            | 0.76      | 62.5                             | 458                       |
| 4                         | -871.849355            | -871.761965            | 0.90      | 54.8                             | 521                       | -871.885543                | -871.792020            | 0.82      | 58.7                             | 487                       | -871.864992            | -871.765271            | 0.76      | 62.6                             | 457                       |
| 5                         | -871.834350            | -871.743110            | 0.87      | 57.3                             | 499                       | -871.874651                | -871.781221            | 0.82      | 58.6                             | 488                       | -871.863626            | -871.764039            | 0.77      | 62.5                             | 458                       |
| 6                         | -871.830548            | -871.745711            | 0.97      | 53.2                             | 537                       | -871.874561                | -871.781004            | 0.79      | 58.7                             | 487                       | -871.879812            | -871.780249            | 0.77      | 62.5                             | 458                       |
| 7                         | -871.823103            | -871.733003            | 0.76      | 56.5                             | 506                       | -871.877487                | -871.782852            | 0.70      | 59.4                             | 481                       | -871.874444            | -871.774610            | 0.76      | 62.6                             | 456                       |
| 8                         | -871.825817            | -871.740184            | 0.95      | 53.7                             | 532                       | -871.874748                | -871.781295            | 0.82      | 58.6                             | 488                       | -871.863421            | -871.763455            | 0.76      | 62.7                             | 456                       |
| 9                         | -871.826133            | -871.738826            | 1.07      | 54.8                             | 522                       | -871.879733                | -871.785604            | 0.76      | 59.1                             | 484                       | -871.863421            | -871.763455            | 0.76      | 62.7                             | 456                       |
| 10                        | -871.856680            | -871.768598            | 0.97      | 55.3                             | 517                       | -871.874651                | -871.781221            | 0.82      | 58.6                             | 488                       | -871.873599            | -871.773768            | 0.76      | 62.6                             | 456                       |
| $\bar{N}$                 |                        |                        |           | 55.0                             | 520                       |                            |                        |           | 58.6                             | 489                       |                        |                        |           | 62.5                             | 457                       |
| $ \bar{N} $               |                        |                        |           | 1.6                              | -15                       |                            |                        |           | 8.9                              | -87                       |                        |                        |           | 1.3                              | -10                       |
| $\sigma_{\bar{N}}$        |                        |                        |           | 1.3                              | 12                        |                            |                        |           | 1.5                              | 13                        |                        |                        |           | 0.2                              | 1                         |
| <b>PoXeR<sub>AT</sub></b> |                        |                        |           |                                  |                           | <b>PoXeR<sub>13C</sub></b> |                        |           |                                  |                           | <b>Rh-A292S</b>        |                        |           |                                  |                           |
| Exp.                      |                        |                        |           | <i>50.3</i>                      | <i>568</i>                |                            |                        |           | <i>52.1</i>                      | <i>549</i>                |                        |                        |           | <i>58.5</i>                      | <i>489</i>                |
| 1                         | -871.669668            | -871.589645            | 1.48      | 50.2                             | 569                       | -871.753876                | -871.667334            | 1.08      | 54.3                             | 526                       | -871.809414            | -871.716900            | 0.87      | 58.1                             | 492                       |
| 2                         | -871.664002            | -871.583714            | 1.48      | 50.4                             | 567                       | -871.753676                | -871.667115            | 1.07      | 54.3                             | 526                       | -871.824426            | -871.730355            | 0.85      | 59.0                             | 484                       |
| 3                         | -871.663689            | -871.581688            | 1.46      | 51.5                             | 556                       | -871.757462                | -871.670750            | 1.07      | 54.4                             | 525                       | -871.804696            | -871.711665            | 0.87      | 58.4                             | 490                       |
| 4                         | -871.671756            | -871.591043            | 1.47      | 50.6                             | 565                       | -871.761107                | -871.674443            | 1.07      | 54.4                             | 526                       | -871.805081            | -871.712002            | 0.87      | 58.4                             | 490                       |
| 5                         | -871.664440            | -871.584516            | 1.58      | 50.2                             | 570                       | -871.753713                | -871.667134            | 1.08      | 54.3                             | 526                       | -871.805352            | -871.711734            | 0.86      | 58.7                             | 487                       |
| 6                         | -871.662765            | -871.581424            | 1.51      | 51.0                             | 560                       | -871.739208                | -871.651960            | 1.08      | 54.7                             | 522                       | -871.802251            | -871.708188            | 0.84      | 59.0                             | 484                       |
| 7                         | -871.672916            | -871.592235            | 1.45      | 50.6                             | 565                       | -871.759283                | -871.672828            | 1.08      | 54.3                             | 527                       | -871.822613            | -871.728757            | 0.85      | 58.9                             | 485                       |
| 8                         | -871.673209            | -871.594136            | 1.46      | 49.6                             | 576                       | -871.754385                | -871.667478            | 1.07      | 54.5                             | 524                       | -871.805085            | -871.711891            | 0.87      | 58.5                             | 489                       |
| 9                         | -871.665943            | -871.585143            | 1.47      | 50.7                             | 564                       | -871.757462                | -871.670750            | 1.07      | 54.4                             | 525                       | -871.802904            | -871.709334            | 0.84      | 58.7                             | 487                       |
| 10                        | -871.669499            | -871.589398            | 1.47      | 50.3                             | 569                       | -871.755760                | -871.668751            | 1.06      | 54.6                             | 524                       | -871.804956            | -871.711295            | 0.86      | 58.8                             | 486                       |
| $\bar{N}$                 |                        |                        |           | 50.5                             | 566                       |                            |                        |           | 54.4                             | 525                       |                        |                        |           | 58.7                             | 487                       |
| $ \bar{N} $               |                        |                        |           | 0.2                              | -2                        |                            |                        |           | 2.3                              | -24                       |                        |                        |           | 0.1                              | -2                        |
| $\sigma_{\bar{N}}$        |                        |                        |           | 0.5                              | 6                         |                            |                        |           | 0.1                              | 1                         |                        |                        |           | 0.3                              | 3                         |
| <b>Rh-A269T</b>           |                        |                        |           |                                  |                           | <b>Rh-E133D</b>            |                        |           |                                  |                           | <b>Rh-E122Q</b>        |                        |           |                                  |                           |
| Exp.                      |                        |                        |           | <i>55.6</i>                      | <i>514</i>                |                            |                        |           | <i>56.1</i>                      | <i>510</i>                |                        |                        |           | <i>59.6</i>                      | <i>480</i>                |
| 1                         | -871.825649            | -871.737189            | 0.92      | 55.5                             | 515                       | -871.753815                | -871.664801            | 0.87      | 55.9                             | 512                       | -871.800783            | -871.706540            | 0.79      | 59.1                             | 483                       |
| 2                         | -871.838544            | -871.748022            | 0.89      | 56.8                             | 503                       | -871.753617                | -871.665207            | 0.92      | 55.5                             | 515                       | -871.799270            | -871.704077            | 0.83      | 59.7                             | 479                       |
| 3                         | -871.828123            | -871.738697            | 0.89      | 56.1                             | 510                       | -871.753702                | -871.665287            | 0.92      | 55.5                             | 515                       | -871.799827            | -871.704259            | 0.77      | 60.0                             | 477                       |
| 4                         | -871.824428            | -871.734210            | 0.91      | 56.6                             | 505                       | -871.754417                | -871.666875            | 0.90      | 54.9                             | 520                       | -871.814554            | -871.717645            | 0.76      | 60.8                             | 470                       |
| 5                         | -871.841457            | -871.750825            | 0.88      | 56.9                             | 503                       | -871.753203                | -871.664739            | 0.91      | 55.5                             | 515                       | -871.811682            | -871.716775            | 0.79      | 59.6                             | 480                       |
| 6                         | -871.824293            | -871.734484            | 0.90      | 56.4                             | 507                       | -871.753398                | -871.664855            | 0.91      | 55.6                             | 515                       | -871.811155            | -871.715410            | 0.81      | 60.1                             | 476                       |
| 7                         | -871.825649            | -871.737189            | 0.92      | 55.5                             | 515                       | -871.754538                | -871.667667            | 0.90      | 54.5                             | 524                       | -871.800921            | -871.706214            | 0.83      | 59.4                             | 481                       |
| 8                         | -871.825649            | -871.737189            | 0.92      | 55.5                             | 515                       | -871.753617                | -871.665117            | 0.92      | 55.5                             | 515                       | -871.800004            | -871.703944            | 0.78      | 60.3                             | 474                       |
| 9                         | -871.825649            | -871.737189            | 0.92      | 55.5                             | 515                       | -871.753648                | -871.665096            | 0.92      | 55.6                             | 515                       | -871.812525            | -871.715966            | 0.97      | 60.6                             | 472                       |
| 10                        | -871.838544            | -871.748022            | 0.89      | 56.8                             | 503                       | -871.753651                | -871.665211            | 0.92      | 55.5                             | 515                       | -871.815900            | -871.720181            | 0.81      | 60.1                             | 476                       |
| $\bar{N}$                 |                        |                        |           | 56.2                             | 509                       |                            |                        |           | 55.4                             | 516                       |                        |                        |           | 60.0                             | 477                       |
| $ \bar{N} $               |                        |                        |           | 0.6                              | -5                        |                            |                        |           | -0.7                             | 6                         |                        |                        |           | 0.4                              | -3                        |
| $\sigma_{\bar{N}}$        |                        |                        |           | 0.6                              | 6                         |                            |                        |           | 0.4                              | 3                         |                        |                        |           | 0.5                              | 4                         |

Continued on next page

Table S3 — continued from previous page

| Seed<br>( $N$ )      | $S_0$ Energy<br>(a.u.) | $S_1$ Energy<br>(a.u.) | $f_{Osc}$ | $\Delta E_{S1-S0}$<br>(kcal/mol) | $\lambda_{max}^a$<br>(nm) | $S_0$ Energy<br>(a.u.)      | $S_1$ Energy<br>(a.u.) | $f_{Osc}$ | $\Delta E_{S1-S0}$<br>(kcal/mol) | $\lambda_{max}^a$<br>(nm) | $S_0$ Energy<br>(a.u.)        | $S_1$ Energy<br>(a.u.) | $f_{Osc}$ | $\Delta E_{S1-S0}$<br>(kcal/mol) | $\lambda_{max}^a$<br>(nm) |
|----------------------|------------------------|------------------------|-----------|----------------------------------|---------------------------|-----------------------------|------------------------|-----------|----------------------------------|---------------------------|-------------------------------|------------------------|-----------|----------------------------------|---------------------------|
| <b>Rh-F261Y</b>      |                        |                        |           |                                  |                           | <b>Rh-G90S</b>              |                        |           |                                  |                           | <b>Rh-T94S</b>                |                        |           |                                  |                           |
| Exp.                 |                        |                        |           | <i>56.1</i>                      | <i>510</i>                |                             |                        |           | <i>58.4</i>                      | <i>489</i>                |                               |                        |           | <i>57.9</i>                      | <i>494</i>                |
| 1                    | -871.816196            | -871.725707            | 0.91      | 56.8                             | 504                       | -871.921780                 | -871.831392            | 0.92      | 56.7                             | 504                       | -871.770032                   | -871.678556            | 0.87      | 57.4                             | 498                       |
| 2                    | -871.815563            | -871.725817            | 0.93      | 56.3                             | 508                       | -871.914877                 | -871.823459            | 0.89      | 57.4                             | 498                       | -871.770404                   | -871.677284            | 0.86      | 58.4                             | 489                       |
| 3                    | -871.816175            | -871.725522            | 0.91      | 56.9                             | 503                       | -871.929366                 | -871.838246            | 0.86      | 57.2                             | 500                       | -871.770444                   | -871.677505            | 0.86      | 58.3                             | 490                       |
| 4                    | -871.815776            | -871.725423            | 0.92      | 56.7                             | 504                       | -871.938941                 | -871.849893            | 0.93      | 55.9                             | 512                       | -871.770373                   | -871.678239            | 0.88      | 57.8                             | 495                       |
| 5                    | -871.815410            | -871.725893            | 0.94      | 56.2                             | 509                       | -871.930656                 | -871.840075            | 0.90      | 56.8                             | 503                       | -871.782211                   | -871.689712            | 0.83      | 58.0                             | 493                       |
| 6                    | -871.815180            | -871.726224            | 0.90      | 55.8                             | 512                       | -871.922076                 | -871.830402            | 0.91      | 57.5                             | 497                       | -871.771338                   | -871.681823            | 0.87      | 56.2                             | 509                       |
| 7                    | -871.822480            | -871.732189            | 0.92      | 56.7                             | 505                       | -871.917704                 | -871.826860            | 0.95      | 57.0                             | 502                       | -871.782302                   | -871.689309            | 0.87      | 58.4                             | 490                       |
| 8                    | -871.815286            | -871.726477            | 0.92      | 55.7                             | 513                       | -871.916073                 | -871.827523            | 0.93      | 55.6                             | 515                       | -871.774594                   | -871.681385            | 0.86      | 58.5                             | 489                       |
| 9                    | -871.816772            | -871.730177            | 0.94      | 54.3                             | 526                       | -871.937800                 | -871.846136            | 0.88      | 57.5                             | 497                       | -871.770751                   | -871.677628            | 0.85      | 58.4                             | 489                       |
| 10                   | -871.815358            | -871.725838            | 0.94      | 56.2                             | 509                       | -871.940414                 | -871.850529            | 0.89      | 56.4                             | 507                       | -871.770621                   | -871.677483            | 0.86      | 58.4                             | 489                       |
| $\bar{N}$            |                        |                        |           | 56.2                             | 509                       |                             |                        |           | 56.8                             | 504                       |                               |                        |           | 58.0                             | 493                       |
| $ \bar{N} $          |                        |                        |           | 0.1                              | -1                        |                             |                        |           | -1.6                             | 15                        |                               |                        |           | 0.1                              | -1                        |
| $\sigma_{\bar{N}}$   |                        |                        |           | 0.8                              | 7                         |                             |                        |           | 0.7                              | 6                         |                               |                        |           | 0.7                              | 6                         |
| <b>Rh-T118A</b>      |                        |                        |           |                                  |                           | <b>Rh-W265Y</b>             |                        |           |                                  |                           | <b>Rh-W265F</b>               |                        |           |                                  |                           |
| Exp.                 |                        |                        |           | <i>59.1</i>                      | <i>484</i>                |                             |                        |           | <i>59.2</i>                      | <i>483</i>                |                               |                        |           | <i>59.6</i>                      | <i>480</i>                |
| 1                    | -871.694563            | -871.599190            | 0.87      | 59.8                             | 478                       | -871.814494                 | -871.719463            | 0.84      | 59.6                             | 479                       | -871.774650                   | -871.679353            | 0.85      | 59.8                             | 478                       |
| 2                    | -871.694419            | -871.599121            | 0.86      | 59.8                             | 478                       | -871.809860                 | -871.714640            | 0.85      | 59.8                             | 479                       | -871.775609                   | -871.679323            | 0.82      | 60.4                             | 473                       |
| 3                    | -871.694311            | -871.599251            | 0.86      | 59.7                             | 479                       | -871.795375                 | -871.702927            | 0.89      | 58.0                             | 493                       | -871.776987                   | -871.682557            | 0.84      | 59.3                             | 483                       |
| 4                    | -871.694043            | -871.598584            | 0.88      | 59.9                             | 477                       | -871.798040                 | -871.704184            | 0.88      | 58.9                             | 485                       | -871.775420                   | -871.679402            | 0.83      | 60.3                             | 475                       |
| 5                    | -871.694469            | -871.599018            | 0.83      | 59.9                             | 477                       | -871.808482                 | -871.714765            | 0.88      | 58.8                             | 486                       | -871.775999                   | -871.679993            | 0.82      | 60.2                             | 475                       |
| 6                    | -871.709362            | -871.613468            | 0.87      | 60.2                             | 475                       | -871.799573                 | -871.706572            | 0.86      | 58.4                             | 490                       | -871.776224                   | -871.680139            | 0.81      | 60.3                             | 474                       |
| 7                    | -871.707837            | -871.612874            | 0.87      | 59.6                             | 480                       | -871.814696                 | -871.721797            | 0.85      | 58.3                             | 490                       | -871.775309                   | -871.680158            | 0.85      | 59.7                             | 479                       |
| 8                    | -871.694493            | -871.599014            | 0.86      | 59.9                             | 477                       | -871.796773                 | -871.701996            | 0.99      | 59.5                             | 481                       | -871.775819                   | -871.679532            | 0.80      | 60.4                             | 473                       |
| 9                    | -871.694177            | -871.599129            | 0.85      | 59.6                             | 479                       | -871.799709                 | -871.706752            | 0.87      | 58.3                             | 490                       | -871.775124                   | -871.680246            | 0.86      | 59.5                             | 480                       |
| 10                   | -871.694452            | -871.601071            | 0.86      | 58.6                             | 488                       | -871.797972                 | -871.704619            | 0.89      | 58.6                             | 488                       | -871.775765                   | -871.679432            | 0.82      | 60.4                             | 473                       |
| $\bar{N}$            |                        |                        |           | 59.7                             | 479                       |                             |                        |           | 58.8                             | 486                       |                               |                        |           | 60.0                             | 476                       |
| $ \bar{N} $          |                        |                        |           | 0.6                              | -5                        |                             |                        |           | -0.4                             | 3                         |                               |                        |           | 0.4                              | -4                        |
| $\sigma_{\bar{N}}$   |                        |                        |           | 0.4                              | 4                         |                             |                        |           | 0.6                              | 5                         |                               |                        |           | 0.4                              | 3                         |
| <b>Rh-D83N-E122Q</b> |                        |                        |           |                                  |                           | <b>Rh-A292S-A295S-A299C</b> |                        |           |                                  |                           | <b>ASR<sub>AT</sub>-D217E</b> |                        |           |                                  |                           |
| Exp.                 |                        |                        |           | <i>60.2</i>                      | <i>475</i>                |                             |                        |           | <i>59.1</i>                      | <i>484</i>                |                               |                        |           | <i>51.8</i>                      | <i>552</i>                |
| 1                    | -872.060033            | -871.964370            | 0.78      | 60.0                             | 476                       | -871.975981                 | -871.881896            | 0.86      | 59.0                             | 484                       | -871.930459                   | -871.846962            | 1.26      | 52.4                             | 546                       |
| 2                    | -872.062205            | -871.964112            | 0.77      | 61.6                             | 464                       | -871.971764                 | -871.878114            | 0.87      | 58.8                             | 487                       | -871.913533                   | -871.829757            | 1.27      | 52.6                             | 544                       |
| 3                    | -872.068860            | -871.972036            | 0.77      | 60.8                             | 471                       | -871.973050                 | -871.878846            | 0.87      | 59.1                             | 484                       | -871.930620                   | -871.847204            | 1.26      | 52.3                             | 546                       |
| 4                    | -872.062291            | -871.964201            | 0.74      | 61.6                             | 465                       | -871.955098                 | -871.862576            | 0.87      | 58.1                             | 492                       | -871.930394                   | -871.846940            | 1.26      | 52.4                             | 546                       |
| 5                    | -872.070497            | -871.974612            | 0.80      | 60.2                             | 475                       | -871.974425                 | -871.882216            | 0.87      | 57.9                             | 494                       | -871.930497                   | -871.846922            | 1.26      | 52.4                             | 545                       |
| 6                    | -872.068335            | -871.971752            | 0.74      | 60.6                             | 472                       | -871.954187                 | -871.862017            | 0.87      | 57.8                             | 494                       | -871.930819                   | -871.847506            | 1.28      | 52.3                             | 547                       |
| 7                    | -872.067357            | -871.969521            | 0.74      | 61.4                             | 466                       | -871.972978                 | -871.878222            | 0.82      | 59.5                             | 481                       | -871.930529                   | -871.847320            | 1.26      | 52.2                             | 548                       |
| 8                    | -872.068999            | -871.971163            | 0.77      | 61.4                             | 466                       | -871.952733                 | -871.860769            | 0.87      | 57.7                             | 495                       | -871.922630                   | -871.844577            | 1.45      | 49.0                             | 584                       |
| 9                    | -872.069687            | -871.971518            | 0.75      | 61.6                             | 464                       | -871.952913                 | -871.859142            | 0.86      | 58.8                             | 486                       | -871.930904                   | -871.847895            | 1.28      | 52.1                             | 549                       |
| 10                   | -872.062174            | -871.963799            | 0.74      | 61.7                             | 463                       | -871.964745                 | -871.870067            | 0.84      | 59.4                             | 481                       | -871.931503                   | -871.848618            | 1.29      | 52.0                             | 550                       |
| $\bar{N}$            |                        |                        |           | 61.1                             | 468                       |                             |                        |           | 58.6                             | 488                       |                               |                        |           | 52.0                             | 550                       |
| $ \bar{N} $          |                        |                        |           | 0.9                              | -7                        |                             |                        |           | -0.5                             | 4                         |                               |                        |           | 0.2                              | -2                        |
| $\sigma_{\bar{N}}$   |                        |                        |           | 0.6                              | 5                         |                             |                        |           | 0.7                              | 5                         |                               |                        |           | 1.1                              | 12                        |

Continued on next page

Table S3 — continued from previous page

| Seed<br>( $N$ )                                     | $S_0$ Energy<br>(a.u.) | $S_1$ Energy<br>(a.u.) | $f_{Osc}$ | $\Delta E_{S1-S0}$<br>(kcal/mol) | $\lambda_{max}^a$<br>(nm)              | $S_0$ Energy<br>(a.u.) | $S_1$ Energy<br>(a.u.) | $f_{Osc}$ | $\Delta E_{S1-S0}$<br>(kcal/mol) | $\lambda_{max}^a$<br>(nm)       | $S_0$ Energy<br>(a.u.) | $S_1$ Energy<br>(a.u.) | $f_{Osc}$ | $\Delta E_{S1-S0}$<br>(kcal/mol) | $\lambda_{max}^a$<br>(nm) |
|-----------------------------------------------------|------------------------|------------------------|-----------|----------------------------------|----------------------------------------|------------------------|------------------------|-----------|----------------------------------|---------------------------------|------------------------|------------------------|-----------|----------------------------------|---------------------------|
| <b><math>\alpha</math>-ARM<sub>customized</sub></b> |                        |                        |           |                                  |                                        |                        |                        |           |                                  |                                 |                        |                        |           |                                  |                           |
| <b>KR2-2<sup>(c)</sup></b>                          |                        |                        |           |                                  | <b>BPR<sup>(c)</sup></b>               |                        |                        |           |                                  | <b>RCone<sup>(c)</sup></b>      |                        |                        |           |                                  |                           |
| Exp.                                                |                        |                        |           | 54.5                             | 525                                    |                        |                        |           | 58.3                             | 490                             |                        |                        |           | 49.7                             | 575                       |
| 1                                                   | -871.806421            | -871.718965            | 1.13      | 54.9                             | 521                                    | -872.093507            | -872.002334            | 0.72      | 57.2                             | 500                             | -871.765053            | -871.680551            | 1.10      | 53.0                             | 539                       |
| 2                                                   | -871.791326            | -871.702123            | 0.87      | 56.0                             | 511                                    | -872.100809            | -872.009175            | 0.73      | 57.5                             | 497                             | -871.754866            | -871.675919            | 1.16      | 49.5                             | 577                       |
| 3                                                   | -871.817554            | -871.728126            | 0.86      | 56.1                             | 509                                    | -872.106426            | -872.015214            | 0.77      | 57.2                             | 500                             | -871.768755            | -871.688682            | 1.06      | 50.2                             | 569                       |
| 4                                                   | -871.816829            | -871.727536            | 0.86      | 56.0                             | 510                                    | -872.094144            | -872.002679            | 0.74      | 57.4                             | 498                             | -871.754665            | -871.676575            | 1.15      | 49.0                             | 583                       |
| 5                                                   | -871.779909            | -871.689883            | 1.00      | 56.5                             | 506                                    | -872.094386            | -872.003224            | 0.76      | 57.2                             | 500                             | -871.752627            | -871.674553            | 1.15      | 49.0                             | 584                       |
| 6                                                   | -871.816854            | -871.727560            | 0.86      | 56.0                             | 510                                    | -872.086504            | -871.995213            | 0.76      | 57.3                             | 499                             | -871.745093            | -871.664668            | 0.99      | 50.5                             | 567                       |
| 7                                                   | -871.791072            | -871.701981            | 0.88      | 55.9                             | 511                                    | -872.086485            | -871.995451            | 0.76      | 57.1                             | 501                             | -871.763063            | -871.683131            | 1.20      | 50.2                             | 570                       |
| 8                                                   | -871.791012            | -871.702218            | 0.89      | 55.7                             | 513                                    | -872.098137            | -872.006542            | 0.74      | 57.5                             | 497                             | -871.754665            | -871.676502            | 1.15      | 49.0                             | 583                       |
| 9                                                   | -871.816596            | -871.727253            | 0.87      | 56.1                             | 510                                    | -872.091678            | -872.001855            | 0.76      | 56.4                             | 507                             | -871.754604            | -871.676427            | 1.15      | 49.1                             | 583                       |
| 10                                                  | -871.816596            | -871.727253            | 0.87      | 56.1                             | 510                                    | -872.096564            | -872.005594            | 0.76      | 57.1                             | 501                             | -871.754866            | -871.675919            | 1.16      | 49.5                             | 577                       |
| $\bar{N}$                                           |                        |                        |           | 55.9                             | 511                                    |                        |                        |           | 57.2                             | 500                             |                        |                        |           | 49.9                             | 573                       |
| $ \bar{N} $                                         |                        |                        |           | 1.4                              | -14                                    |                        |                        |           | -1.1                             | 10                              |                        |                        |           | 0.2                              | -2                        |
| $\sigma_{\bar{N}}$                                  |                        |                        |           | 0.4                              | 4                                      |                        |                        |           | 0.3                              | 3                               |                        |                        |           | 1.2                              | 14                        |
| <b>ChR<sub>C1C2</sub><sup>(c)</sup></b>             |                        |                        |           |                                  | <b>ChR2<sup>(c)</sup></b>              |                        |                        |           |                                  | <b>ChR2-C128T<sup>(c)</sup></b> |                        |                        |           |                                  |                           |
| Exp.                                                |                        |                        |           | 62.4                             | 458                                    |                        |                        |           | 60.8                             | 470                             |                        |                        |           | 59.0                             | 485                       |
| 1                                                   | -871.766869            | -871.665904            | 0.64      | 63.4                             | 451                                    | -871.966578            | -871.869065            | 0.80      | 61.2                             | 467                             | -871.968173            | -871.873554            | 0.94      | 59.4                             | 482                       |
| 2                                                   | -871.765234            | -871.662713            | 0.57      | 64.3                             | 444                                    | -871.959771            | -871.858873            | 0.78      | 63.3                             | 452                             | -871.968639            | -871.874623            | 0.98      | 59.0                             | 485                       |
| 3                                                   | -871.766757            | -871.665228            | 0.63      | 63.7                             | 449                                    | -871.966354            | -871.868754            | 0.79      | 61.2                             | 467                             | -871.975749            | -871.881662            | 0.94      | 59.0                             | 484                       |
| 4                                                   | -871.766078            | -871.664917            | 0.63      | 63.5                             | 450                                    | -871.966776            | -871.869326            | 0.81      | 61.2                             | 468                             | -871.968681            | -871.873604            | 0.96      | 59.7                             | 479                       |
| 5                                                   | -871.765935            | -871.666631            | 0.72      | 62.3                             | 459                                    | -871.960907            | -871.859742            | 0.75      | 63.5                             | 450                             | -871.968570            | -871.874403            | 0.95      | 59.1                             | 484                       |
| 6                                                   | -871.766677            | -871.665276            | 0.63      | 63.6                             | 449                                    | -871.959581            | -871.858404            | 0.72      | 63.5                             | 450                             | -871.968575            | -871.874466            | 0.95      | 59.1                             | 484                       |
| 7                                                   | -871.765845            | -871.662488            | 0.57      | 64.9                             | 441                                    | -871.967420            | -871.869935            | 0.88      | 61.2                             | 467                             | -871.974295            | -871.880181            | 0.90      | 59.1                             | 484                       |
| 8                                                   | -871.766857            | -871.665751            | 0.65      | 63.4                             | 451                                    | -871.959226            | -871.858047            | 0.64      | 63.5                             | 450                             | -871.965017            | -871.870650            | 0.96      | 59.2                             | 483                       |
| 9                                                   | -871.766838            | -871.665506            | 0.64      | 63.6                             | 450                                    | -871.936490            | -871.839350            | 0.89      | 61.0                             | 469                             | -871.968436            | -871.874313            | 0.96      | 59.1                             | 484                       |
| 10                                                  | -871.765786            | -871.662497            | 0.57      | 64.8                             | 441                                    | -871.960510            | -871.859972            | 0.67      | 63.1                             | 453                             | -871.969026            | -871.873936            | 0.95      | 59.7                             | 479                       |
| $\bar{N}$                                           |                        |                        |           | 63.8                             | 449                                    |                        |                        |           | 62.3                             | 459                             |                        |                        |           | 59.2                             | 483                       |
| $ \bar{N} $                                         |                        |                        |           | 1.4                              | -9                                     |                        |                        |           | 1.5                              | -11                             |                        |                        |           | 0.2                              | -2                        |
| $\sigma_{\bar{N}}$                                  |                        |                        |           | 0.8                              | 5                                      |                        |                        |           | 1.2                              | 9                               |                        |                        |           | 0.3                              | 2                         |
| <b>bR<sub>AT</sub><sup>(c)</sup></b>                |                        |                        |           |                                  | <b>bR<sub>AT</sub><sup>(c-2)</sup></b> |                        |                        |           |                                  |                                 |                        |                        |           |                                  |                           |
| Exp.                                                |                        |                        |           | 50.3                             | 568                                    |                        |                        |           | 50.3                             | 568                             |                        |                        |           |                                  |                           |
| 1                                                   | -871.749782            | -871.669143            | 1.43      | 50.6                             | 565.0275404                            | -872.054117            | -871.973964            | 1.38      | 50.3                             | 568                             |                        |                        |           |                                  |                           |
| 2                                                   | -871.748107            | -871.667915            | 1.43      | 50.3                             | 568.1787667                            | -872.052652            | -871.972753            | 1.37      | 50.1                             | 570                             |                        |                        |           |                                  |                           |
| 3                                                   | -871.748042            | -871.667100            | 1.43      | 50.8                             | 562.9133129                            | -872.052420            | -871.972882            | 1.40      | 49.9                             | 573                             |                        |                        |           |                                  |                           |
| 4                                                   | -871.747525            | -871.666578            | 1.42      | 50.8                             | 562.8774994                            | -872.052928            | -871.971979            | 1.38      | 50.8                             | 563                             |                        |                        |           |                                  |                           |
| 5                                                   | -871.748246            | -871.667982            | 1.44      | 50.4                             | 567.6712091                            | -872.055789            | -871.975009            | 1.36      | 50.7                             | 564                             |                        |                        |           |                                  |                           |
| 6                                                   | -871.747018            | -871.666745            | 1.43      | 50.4                             | 567.59929                              | -872.055729            | -871.974957            | 1.36      | 50.7                             | 564                             |                        |                        |           |                                  |                           |
| 7                                                   | -871.747316            | -871.666612            | 1.43      | 50.6                             | 564.5677742                            | -872.056266            | -871.975792            | 1.37      | 50.5                             | 566                             |                        |                        |           |                                  |                           |
| 8                                                   | -871.747537            | -871.666875            | 1.42      | 50.6                             | 564.8664286                            | -872.054117            | -871.973964            | 1.38      | 50.3                             | 568                             |                        |                        |           |                                  |                           |
| 9                                                   | -871.757220            | -871.675159            | 1.39      | 51.5                             | 555.2339365                            | -872.055797            | -871.975020            | 1.35      | 50.7                             | 564                             |                        |                        |           |                                  |                           |
| 10                                                  | -871.747892            | -871.667378            | 1.43      | 50.5                             | 565.903774                             | -872.060348            | -871.980071            | 1.37      | 50.4                             | 568                             |                        |                        |           |                                  |                           |
| $\bar{N}$                                           |                        |                        |           | 50.7                             | 564                                    |                        |                        |           | 50.4                             | 567                             |                        |                        |           |                                  |                           |
| $ \bar{N} $                                         |                        |                        |           | 0.4                              | -4                                     |                        |                        |           | 0.1                              | -1                              |                        |                        |           |                                  |                           |

Continued on next page

Table S3 — continued from previous page

| Seed<br>( $N$ )                                                              | $S_0$ Energy<br>(a.u.) | $S_1$ Energy<br>(a.u.) | $f_{Osc}$ | $\Delta E_{S1-S0}$<br>(kcal/mol) | $\lambda_{max}^a$<br>(nm) | $S_0$ Energy<br>(a.u.)           | $S_1$ Energy<br>(a.u.) | $f_{Osc}$ | $\Delta E_{S1-S0}$<br>(kcal/mol) | $\lambda_{max}^a$<br>(nm) | $S_0$ Energy<br>(a.u.)                 | $S_1$ Energy<br>(a.u.) | $f_{Osc}$ | $\Delta E_{S1-S0}$<br>(kcal/mol) | $\lambda_{max}^a$<br>(nm) |
|------------------------------------------------------------------------------|------------------------|------------------------|-----------|----------------------------------|---------------------------|----------------------------------|------------------------|-----------|----------------------------------|---------------------------|----------------------------------------|------------------------|-----------|----------------------------------|---------------------------|
| $\sigma_{\bar{N}}$                                                           |                        |                        |           | 0.3                              | 4                         |                                  |                        |           | 0.3                              | 3                         |                                        |                        |           |                                  |                           |
| <b><math>\alpha</math>-ARM<sub>customized</sub> (Effect of chain and pH)</b> |                        |                        |           |                                  |                           |                                  |                        |           |                                  |                           |                                        |                        |           |                                  |                           |
| <b>ASR<sub>AT-1</sub>(c-pH)</b>                                              |                        |                        |           |                                  |                           | <b>ASR<sub>13C-2</sub>(c-pH)</b> |                        |           |                                  |                           | <b>bR<sub>13C</sub><sup>c-pH</sup></b> |                        |           |                                  |                           |
| Exp.                                                                         |                        |                        |           | 52.0                             | 550                       |                                  |                        |           | 53.2                             | 537                       |                                        |                        |           | 52.2                             | 547                       |
| 1                                                                            | -872.011057            | -871.916625            | 0.97      | 59.3                             | 483                       | -872.030188                      | -871.934729            | 1.10      | 59.9                             | 477                       | -872.304485                            | -872.203163            | 0.62      | 63.6                             | 450                       |
| 2                                                                            | -872.010414            | -871.916614            | 0.95      | 58.9                             | 486                       | -872.024819                      | -871.930528            | 0.96      | 59.2                             | 483                       | -872.300505                            | -872.199325            | 0.64      | 63.5                             | 450                       |
| 3                                                                            | -872.009242            | -871.915443            | 1.00      | 58.9                             | 486                       | -872.024947                      | -871.930541            | 0.92      | 59.2                             | 483                       | -872.288999                            | -872.188334            | 0.66      | 63.2                             | 453                       |
| 4                                                                            | -872.009660            | -871.916203            | 0.98      | 58.6                             | 488                       | -872.024825                      | -871.930716            | 0.95      | 59.1                             | 484                       | -872.289389                            | -872.188806            | 0.67      | 63.1                             | 453                       |
| 5                                                                            | -871.997217            | -871.906871            | 1.19      | 56.7                             | 504                       | -872.025047                      | -871.930507            | 0.93      | 59.3                             | 482                       | -872.288866                            | -872.188332            | 0.68      | 63.1                             | 453                       |
| 6                                                                            | -872.009659            | -871.915884            | 0.98      | 58.8                             | 486                       | -872.025166                      | -871.930423            | 0.93      | 59.5                             | 481                       | -872.301111                            | -872.200178            | 0.65      | 63.3                             | 451                       |
| 7                                                                            | -872.001978            | -871.905460            | 0.85      | 60.6                             | 472                       | -872.057313                      | -871.964260            | 0.93      | 58.4                             | 490                       | -872.294073                            | -872.193273            | 0.64      | 63.3                             | 452                       |
| 8                                                                            | -872.012484            | -871.917874            | 0.94      | 59.4                             | 482                       | -872.025158                      | -871.930510            | 0.93      | 59.4                             | 481                       | -872.288968                            | -872.188371            | 0.63      | 63.1                             | 453                       |
| 9                                                                            | -872.009637            | -871.915918            | 0.96      | 58.8                             | 486                       | -872.057181                      | -871.964433            | 0.92      | 58.2                             | 491                       | -872.288981                            | -872.188391            | 0.64      | 63.1                             | 453                       |
| 10                                                                           | -872.009541            | -871.914735            | 1.01      | 59.5                             | 481                       | -872.024881                      | -871.930195            | 0.95      | 59.4                             | 481                       | -872.294849                            | -872.19439             | 0.67      | 63                               | 454                       |
| $\bar{N}$                                                                    |                        |                        |           | 59.0                             | 485                       |                                  |                        |           | 59.2                             | 483                       |                                        |                        |           | 63.2                             | 452                       |
| $ \bar{N} $                                                                  |                        |                        |           | 7.0                              | -65                       |                                  |                        |           | 6.0                              | -54                       |                                        |                        |           | 11.0                             | -95                       |
| $\sigma_{\bar{N}}$                                                           |                        |                        |           | 1.0                              | 8                         |                                  |                        |           | 0.5                              | 4                         |                                        |                        |           | 0.2                              | 1                         |
| <b>bR(c-pH)</b>                                                              |                        |                        |           |                                  |                           | <b>bathoRh(c-pH)</b>             |                        |           |                                  |                           | <b>bathoRh<sup>(c)</sup></b>           |                        |           |                                  |                           |
| Exp.                                                                         |                        |                        |           | 50.3                             | 568                       |                                  |                        |           | 54                               | 529                       |                                        |                        |           | 54                               | 529                       |
| 1                                                                            | -871.892865            | -871.790117            | 0.65      | 64.5                             | 443                       | -871.806085                      | -871.716416            | 0.92      | 56.3                             | 508                       | -871.931                               | -871.844269            | 1.08      | 54.4                             | 525                       |
| 2                                                                            | -871.892663            | -871.790024            | 0.65      | 64.4                             | 444                       | -871.785693                      | -871.69443             | 0.93      | 57.3                             | 499                       | -871.916126                            | -871.830093            | 1.17      | 54                               | 530                       |
| 3                                                                            | -871.892744            | -871.790225            | 0.66      | 64.3                             | 444                       | -871.780228                      | -871.689937            | 0.97      | 56.7                             | 505                       | -871.911142                            | -871.825087            | 1.09      | 54                               | 529                       |
| 4                                                                            | -871.892706            | -871.789216            | 0.71      | 64.9                             | 440                       | -871.803163                      | -871.712138            | 0.95      | 57.1                             | 501                       | -871.916011                            | -871.831531            | 1.06      | 53                               | 539                       |
| 5                                                                            | -871.892778            | -871.790061            | 0.65      | 64.5                             | 444                       | -871.778822                      | -871.687377            | 0.91      | 57.4                             | 498                       | -871.911302                            | -871.825178            | 1.09      | 54                               | 529                       |
| 6                                                                            | -871.892712            | -871.790196            | 0.66      | 64.3                             | 444                       | -871.780053                      | -871.689403            | 0.96      | 56.9                             | 503                       | -871.927654                            | -871.841412            | 1.08      | 54.1                             | 528                       |
| 7                                                                            | -871.892806            | -871.790431            | 0.65      | 64.2                             | 445                       | -871.779492                      | -871.688817            | 0.86      | 56.9                             | 502                       | -871.916213                            | -871.829872            | 1.15      | 54.2                             | 528                       |
| 8                                                                            | -871.892654            | -871.790464            | 0.65      | 64.1                             | 446                       | -871.81367                       | -871.721809            | 0.81      | 57.6                             | 496                       | -871.911089                            | -871.825008            | 1.08      | 54                               | 529                       |
| 9                                                                            | -871.891477            | -871.791638            | 0.69      | 62.6                             | 456                       | -871.785693                      | -871.69443             | 0.93      | 57.3                             | 499                       | -871.927479                            | -871.841084            | 1.09      | 54.2                             | 527                       |
| 10                                                                           | -871.892663            | -871.790024            | 0.65      | 64.4                             | 444                       | -871.778822                      | -871.687377            | 0.91      | 57.4                             | 498                       | -871.915855                            | -871.829806            | 1.09      | 54                               | 530                       |
| $\bar{N}$                                                                    |                        |                        |           | 64.2                             | 445                       |                                  |                        |           | 57.1                             | 501                       |                                        |                        |           | 54.0                             | 529                       |
| $ \bar{N} $                                                                  |                        |                        |           | 13.9                             | -123                      |                                  |                        |           | 3.1                              | -28                       |                                        |                        |           | 0.0                              | 0                         |
| $\sigma_{\bar{N}}$                                                           |                        |                        |           | 0.6                              | 4                         |                                  |                        |           | 0.4                              | 4                         |                                        |                        |           | 0.4                              | 4                         |
| <b>BPR(c-2)</b>                                                              |                        |                        |           |                                  |                           | <b>BPR(c-pH-2)</b>               |                        |           |                                  |                           | <b>Rh<sup>(c)</sup></b>                |                        |           |                                  |                           |
| Exp.                                                                         |                        |                        |           | 58.3                             | 490                       |                                  |                        |           | 58.3                             | 490                       |                                        |                        |           | 57.4                             | 498                       |
| 1                                                                            | -872.092199            | -871.990725            | 0.58      | 63.7                             | 449                       | -872.141865                      | -872.051133            | 0.86      | 56.9                             | 502                       | -871.960867                            | -871.871577            | 0.94      | 56                               | 510                       |
| 2                                                                            | -872.092759            | -871.991196            | 0.58      | 63.7                             | 449                       | -872.133237                      | -872.042133            | 0.89      | 57.2                             | 500                       | -871.95992                             | -871.86997             | 1.11      | 56.4                             | 507                       |
| 3                                                                            | -872.09237             | -871.990778            | 0.57      | 63.7                             | 448                       | -872.14175                       | -872.051126            | 0.86      | 56.9                             | 503                       | -871.972581                            | -871.882799            | 0.89      | 56.3                             | 507                       |
| 4                                                                            | -872.091715            | -871.990006            | 0.62      | 63.8                             | 448                       | -872.141611                      | -872.050852            | 0.86      | 57                               | 502                       | -871.960032                            | -871.870863            | 1.1       | 56                               | 511                       |
| 5                                                                            | -872.093278            | -871.99146             | 0.60      | 63.9                             | 447                       | -872.133057                      | -872.041955            | 0.88      | 57.2                             | 500                       | -871.961765                            | -871.873231            | 0.96      | 55.6                             | 515                       |
| 6                                                                            | -872.091774            | -871.990248            | 0.57      | 63.7                             | 449                       | -872.132986                      | -872.042078            | 0.87      | 57                               | 501                       | -871.971835                            | -871.882364            | 0.93      | 56.1                             | 509                       |
| 7                                                                            | -872.092212            | -871.990614            | 0.56      | 63.8                             | 448                       | -872.140381                      | -872.049827            | 0.86      | 56.8                             | 503                       | -871.964434                            | -871.875355            | 1.12      | 55.9                             | 511                       |
| 8                                                                            | -872.102907            | -872.00099             | 0.56      | 64.0                             | 447                       | -872.133413                      | -872.042384            | 0.89      | 57.1                             | 501                       | -871.960524                            | -871.873657            | 0.94      | 54.5                             | 525                       |
| 9                                                                            | -872.092288            | -871.990441            | 0.57      | 63.9                             | 447                       | -872.141516                      | -872.050709            | 0.85      | 57                               | 502                       | -871.971679                            | -871.884234            | 0.94      | 54.9                             | 521                       |
| 10                                                                           | -872.089566            | -871.988996            | 0.47      | 63.1                             | 453                       | -872.133237                      | -872.042133            | 0.89      | 57.2                             | 500                       | -871.969553                            | -871.879925            | 0.93      | 56.2                             | 508                       |
| $\bar{N}$                                                                    |                        |                        |           | 63.7                             | 449                       |                                  |                        |           | 57.0                             | 501                       |                                        |                        |           | 55.8                             | 512                       |

Continued on next page

Table S3 — continued from previous page

| Seed<br>( $N$ )         | S <sub>0</sub> Energy<br>(a.u.) | S <sub>1</sub> Energy<br>(a.u.) | $f_{Osc}$ | $\Delta E_{S1-S0}$<br>(kcal/mol) | $\lambda_{max}^a$<br>(nm) | S <sub>0</sub> Energy<br>(a.u.) | S <sub>1</sub> Energy<br>(a.u.) | $f_{Osc}$ | $\Delta E_{S1-S0}$<br>(kcal/mol) | $\lambda_{max}^a$<br>(nm) | S <sub>0</sub> Energy<br>(a.u.) | S <sub>1</sub> Energy<br>(a.u.) | $f_{Osc}$ | $\Delta E_{S1-S0}$<br>(kcal/mol) | $\lambda_{max}^a$<br>(nm) |
|-------------------------|---------------------------------|---------------------------------|-----------|----------------------------------|---------------------------|---------------------------------|---------------------------------|-----------|----------------------------------|---------------------------|---------------------------------|---------------------------------|-----------|----------------------------------|---------------------------|
| $\overline{N}$          |                                 |                                 |           | 5.4                              | -42                       |                                 |                                 |           | -1.3                             | 11                        |                                 |                                 |           | -1.6                             | 14                        |
| $\sigma_{\overline{N}}$ |                                 |                                 |           | 0.2                              | 2                         |                                 |                                 |           | 0.1                              | 1                         |                                 |                                 |           | 0.6                              | 6                         |
|                         | <b>Rh<sup>c</sup>-PH-2</b>      |                                 |           |                                  |                           | <b>SqRh<sup>c</sup></b>         |                                 |           |                                  |                           |                                 |                                 |           |                                  |                           |
| Exp.                    |                                 |                                 |           | 57.4                             | 498                       |                                 |                                 |           | 58.5                             | 489                       |                                 |                                 |           |                                  |                           |
| 1                       | -872.001068                     | -871.897257                     | 0.75      | 65.1                             | 439                       | -871.756918                     | -871.662109                     | 0.82      | 59.5                             | 481                       |                                 |                                 |           |                                  |                           |
| 2                       | -872.000111                     | -871.897181                     | 0.68      | 64.6                             | 443                       | -871.758008                     | -871.663224                     | 0.83      | 59.5                             | 481                       |                                 |                                 |           |                                  |                           |
| 3                       | -872.000981                     | -871.897183                     | 0.74      | 65.1                             | 439                       | -871.757519                     | -871.663524                     | 0.84      | 59                               | 485                       |                                 |                                 |           |                                  |                           |
| 4                       | -872.000954                     | -871.897406                     | 0.74      | 65.0                             | 440                       | -871.757079                     | -871.662262                     | 0.83      | 59.5                             | 481                       |                                 |                                 |           |                                  |                           |
| 5                       | -872.001058                     | -871.897215                     | 0.75      | 65.2                             | 439                       | -871.757597                     | -871.66267                      | 0.82      | 59.6                             | 480                       |                                 |                                 |           |                                  |                           |
| 6                       | -872.000881                     | -871.896998                     | 0.74      | 65.2                             | 439                       | -871.757229                     | -871.662417                     | 0.82      | 59.5                             | 481                       |                                 |                                 |           |                                  |                           |
| 7                       | -872.001147                     | -871.897332                     | 0.75      | 65.1                             | 439                       | -871.757272                     | -871.662533                     | 0.82      | 59.4                             | 481                       |                                 |                                 |           |                                  |                           |
| 8                       | -872.000922                     | -871.897069                     | 0.74      | 65.2                             | 439                       | -871.756828                     | -871.66209                      | 0.82      | 59.4                             | 481                       |                                 |                                 |           |                                  |                           |
| 9                       | -872.001094                     | -871.897164                     | 0.74      | 65.2                             | 438                       | -871.757211                     | -871.663164                     | 0.84      | 59                               | 484                       |                                 |                                 |           |                                  |                           |
| 10                      | -872.009042                     | -871.906454                     | 0.75      | 64.4                             | 444                       | -871.756865                     | -871.66208                      | 0.82      | 59.5                             | 481                       |                                 |                                 |           |                                  |                           |
| $\overline{N}$          |                                 |                                 |           | 65.0                             | 440                       |                                 |                                 |           | 59.4                             | 482                       |                                 |                                 |           |                                  |                           |
| $ \overline{N} $        |                                 |                                 |           | 7.6                              | -58                       |                                 |                                 |           | 0.9                              | -7                        |                                 |                                 |           |                                  |                           |
| $\sigma_{\overline{N}}$ |                                 |                                 |           | 0.3                              | 2                         |                                 |                                 |           | 0.2                              | 2                         |                                 |                                 |           |                                  |                           |



Table S4: Trend deviation factor ( $||\text{Trend Dev.}||$ ) for the  $a\text{-ARM}_{\text{default}}$  and  $a\text{-ARM}_{\text{customized}}$  approaches, expressed as mean absolute error (MAE) and mean absolute deviation (MAD) of the x=38 rhodopsins of the benchmark set.

| Rhodopsin                      | $a\text{-ARM}_{\text{default}}$        |                                         |                             |                           |                                           |                             | $a\text{-ARM}_{\text{customized}}$ |                           |                                           |                             |                           |
|--------------------------------|----------------------------------------|-----------------------------------------|-----------------------------|---------------------------|-------------------------------------------|-----------------------------|------------------------------------|---------------------------|-------------------------------------------|-----------------------------|---------------------------|
|                                | $\Delta E_{\text{S1-S0}}^{\text{Exp}}$ | $\delta_{x,\text{Exp}}^{\text{Rh,Exp}}$ | $\Delta E_{\text{S1-S0}}^a$ | $\Delta E_{\text{S1-S0}}$ | $\delta_{x,\text{Calc}}^{\text{Rh,Calc}}$ | $\Delta E_{\text{S1-S0}}^b$ | $  \text{Trend Dev.}  ^c$          | $\Delta E_{\text{S1-S0}}$ | $\delta_{x,\text{Calc}}^{\text{Rh,Calc}}$ | $\Delta E_{\text{S1-S0}}^b$ | $  \text{Trend Dev.}  ^c$ |
| Rh                             | 57.4                                   |                                         | 0.0                         | 57.7                      | 0.0                                       | 0.0                         | 0.0                                | 57.7                      | 0.0                                       | 0.0                         | 0.0                       |
| bathoRh                        | 54.0                                   |                                         | 3.4                         | 56.1                      | 1.6                                       | 1.8                         | 1.8                                | 56.1                      | 1.6                                       | 1.6                         | 1.8                       |
| SqRh                           | 58.5                                   |                                         | 1.1                         | 60.9                      | 3.2                                       | 2.1                         | 2.1                                | 60.9                      | 3.2                                       | 3.2                         | 2.1                       |
| BPR                            | 58.3                                   |                                         | 0.9                         | 63.7                      | 6.0                                       | 5.1                         | 5.1                                | 57.0                      | 0.7                                       | 0.7                         | 0.2                       |
| ASR <sub>AT</sub> -1           | 52.1                                   |                                         | 5.3                         | 52.4                      | 5.3                                       | 0.0                         | 0.0                                | 52.4                      | 5.3                                       | 5.3                         | 0.0                       |
| ASR <sub>13C</sub> -2          | 53.2                                   |                                         | 4.2                         | 54.2                      | 3.5                                       | 0.7                         | 0.7                                | 54.2                      | 3.5                                       | 3.5                         | 0.7                       |
| bR <sub>AT</sub>               | 50.3                                   |                                         | 7.1                         | 53.2                      | 4.5                                       | 2.6                         | 2.6                                | 50.6                      | 7.1                                       | 7.1                         | 0.0                       |
| bR <sub>13C</sub>              | 52.2                                   |                                         | 5.2                         | 53.3                      | 4.4                                       | 0.8                         | 0.8                                | 53.3                      | 4.4                                       | 4.4                         | 0.8                       |
| ChR <sub>C1C2</sub>            | 62.4                                   |                                         | 5.0                         | 76.9                      | 19.2                                      | 14.2                        | 14.2                               | 63.8                      | 6.1                                       | 6.1                         | 1.1                       |
| hMeOp                          | 60.4                                   |                                         | 3.0                         | 61.2                      | 3.5                                       | 0.5                         | 0.5                                | 61.2                      | 3.5                                       | 3.5                         | 0.5                       |
| BCone                          | 66.5                                   |                                         | 9.1                         | 67.8                      | 10.1                                      | 1.0                         | 1.0                                | 67.8                      | 10.1                                      | 10.1                        | 1.0                       |
| GCone                          | 53.4                                   |                                         | 4.0                         | 55.0                      | 2.7                                       | 1.3                         | 1.3                                | 55.0                      | 2.7                                       | 2.7                         | 1.3                       |
| RCone                          | 49.7                                   |                                         | 7.7                         | 58.5                      | 0.8                                       | 6.9                         | 6.9                                | 49.9                      | 7.8                                       | 7.8                         | 0.1                       |
| mMeOp                          | 61.2                                   |                                         | 3.8                         | 62.3                      | 4.6                                       | 0.8                         | 0.8                                | 62.3                      | 4.6                                       | 4.6                         | 0.8                       |
| SqbaRh                         | 54.0                                   |                                         | 3.4                         | 55.5                      | 2.2                                       | 1.2                         | 1.2                                | 55.5                      | 2.2                                       | 2.2                         | 1.2                       |
| SR-II                          | 57.5                                   |                                         | 0.1                         | 58.0                      | 0.3                                       | 0.2                         | 0.2                                | 58.0                      | 0.3                                       | 0.3                         | 0.2                       |
| ASR <sub>AT</sub> -D217E       | 52.0                                   |                                         | 5.4                         | 51.8                      | 5.9                                       | 0.5                         | 0.5                                | 51.8                      | 5.9                                       | 5.9                         | 0.5                       |
| Arch1                          | 50.3                                   |                                         | 7.1                         | 50.5                      | 7.2                                       | 0.1                         | 0.1                                | 50.5                      | 7.2                                       | 7.2                         | 0.1                       |
| AARh                           | 56.3                                   |                                         | 1.1                         | 58.9                      | 1.2                                       | 0.1                         | 0.1                                | 58.9                      | 1.2                                       | 1.2                         | 0.1                       |
| Arch2                          | 52.0                                   |                                         | 5.4                         | 54.5                      | 3.2                                       | 2.2                         | 2.2                                | 54.5                      | 3.2                                       | 3.2                         | 2.2                       |
| ChR2                           | 60.8                                   |                                         | 3.4                         | 79.9                      | 22.2                                      | 18.8                        | 18.8                               | 63.3                      | 5.6                                       | 5.6                         | 2.2                       |
| ChR2-C128T                     | 59.0                                   |                                         | 1.6                         | 79.7                      | 22.0                                      | 20.4                        | 20.4                               | 59.2                      | 1.5                                       | 1.5                         | 0.1                       |
| KR2-2                          | 54.4                                   |                                         | 3.0                         | 69.4                      | 11.7                                      | 8.7                         | 8.7                                | 55.9                      | 1.8                                       | 1.8                         | 1.2                       |
| PoXeR <sub>AT</sub>            | 50.3                                   |                                         | 7.1                         | 50.5                      | 7.2                                       | 0.1                         | 0.1                                | 50.5                      | 7.2                                       | 7.2                         | 0.1                       |
| PoXeR <sub>13C</sub>           | 52.1                                   |                                         | 5.3                         | 54.3                      | 3.4                                       | 1.9                         | 1.9                                | 54.3                      | 3.4                                       | 3.4                         | 1.9                       |
| NM-R3                          | 55.3                                   |                                         | 2.1                         | 56.1                      | 1.6                                       | 0.5                         | 0.5                                | 56.1                      | 1.6                                       | 1.6                         | 0.5                       |
| CIR                            | 55.3                                   |                                         | 2.1                         | 55.2                      | 2.5                                       | 0.4                         | 0.4                                | 55.2                      | 2.5                                       | 2.5                         | 0.4                       |
| F261Y                          | 56.1                                   |                                         | 1.3                         | 56.2                      | 1.5                                       | 0.2                         | 0.2                                | 56.2                      | 1.5                                       | 1.5                         | 0.2                       |
| T94S                           | 57.9                                   |                                         | 0.5                         | 58.0                      | 0.3                                       | 0.2                         | 0.2                                | 58.0                      | 0.3                                       | 0.3                         | 0.2                       |
| A292S                          | 58.5                                   |                                         | 1.1                         | 58.7                      | 1.0                                       | 0.1                         | 0.1                                | 58.7                      | 1.0                                       | 1.0                         | 0.1                       |
| W265Y                          | 59.0                                   |                                         | 1.6                         | 58.8                      | 1.1                                       | 0.5                         | 0.5                                | 58.8                      | 1.1                                       | 1.1                         | 0.5                       |
| W265F                          | 59.6                                   |                                         | 2.2                         | 60.0                      | 2.3                                       | 0.1                         | 0.1                                | 60.0                      | 2.3                                       | 2.3                         | 0.1                       |
| T118A                          | 59.1                                   |                                         | 1.7                         | 59.7                      | 2.0                                       | 0.3                         | 0.3                                | 59.7                      | 2.0                                       | 2.0                         | 0.3                       |
| G90S                           | 58.4                                   |                                         | 1.0                         | 57.1                      | 0.6                                       | 0.4                         | 0.4                                | 57.1                      | 0.6                                       | 0.6                         | 0.4                       |
| E122Q                          | 59.6                                   |                                         | 2.2                         | 60.0                      | 2.3                                       | 0.1                         | 0.1                                | 60.0                      | 2.3                                       | 2.3                         | 0.1                       |
| A269T                          | 55.6                                   |                                         | 1.8                         | 56.1                      | 1.6                                       | 0.2                         | 0.2                                | 56.1                      | 1.6                                       | 1.6                         | 0.2                       |
| E113D                          | 56.1                                   |                                         | 1.3                         | 55.4                      | 2.3                                       | 1.0                         | 1.0                                | 55.4                      | 2.3                                       | 2.3                         | 1.0                       |
| D83N/E122Q                     | 60.2                                   |                                         | 2.8                         | 60.9                      | 3.2                                       | 0.4                         | 0.4                                | 60.9                      | 3.2                                       | 3.2                         | 0.4                       |
| A292S/A295S/A299C              | 59.1                                   |                                         | 1.7                         | 58.6                      | 0.9                                       | 0.8                         | 0.8                                | 58.6                      | 0.9                                       | 0.9                         | 0.8                       |
| MAE of $  \text{Trend Dev.}  $ |                                        |                                         |                             |                           |                                           |                             | 2.5                                |                           |                                           |                             | 0.7                       |
| MAD of $  \text{Trend Dev.}  $ |                                        |                                         |                             |                           |                                           |                             | 1.2                                |                           |                                           |                             | 0.5                       |

<sup>a</sup>Difference between the experimental  $\Delta E_{\text{S1-S0}}^{\text{Exp}}$  of each of the x rhodopsins with respect to experimental value of Rh ( $\delta_{x,\text{Exp}}^{\text{Rh,Exp}} \Delta E_{\text{S1-S0}}$ ).

<sup>b</sup>Difference between the calculated  $\Delta E_{\text{S1-S0}}$  of each of the x rhodopsins with respect to calculated value of Rh ( $\delta_{x,\text{Calc}}^{\text{Rh,Calc}} \Delta E_{\text{S1-S0}}$ ).

<sup>c</sup> $||\text{Trend Dev.}|| = |(\delta_{x,\text{Exp}}^{\text{Rh,Exp}} \Delta E_{\text{S1-S0}}) - (\delta_{x,\text{Calc}}^{\text{Rh,Calc}} \Delta E_{\text{S1-S0}})|$

## **S7 Details of the employed comparative modelling protocol for AARh, PoXeR, hMeOp, mMeOp and BCone, GCone, RCone**

Comparative modeling was carried out by means of the software MODELLER 1.<sup>7</sup> Sequence identity between target and template protein dictated the modeling strategy. In that respect, values 70% without gaps allowed simple substitution of mutated amino acid side chains while transferring the coordinates of all main chain and of conserved side chain atoms. That was the case of AARh, characterized by 93% of sequence identity to the template, bovine rhodopsin. The same approach was used for modeling PoXeR, in spite of a sequence identity to the Anabaena sensory rhodopsin template lower than the threshold above (i.e. 51%). The reason was that the modeled PoXeR primary sequence aligned without gaps to the sequence of the template and almost all mutated positions point towards the membrane or the extracellular and intracellular water (i.e. only 8 out of the 106 mutated positions point towards the core of the helix bundle).

The same approach was used for modeling PoXeR, whose primary sequence aligned without gaps to the sequence of the Anabaena sensory rhodopsin template, mutated amino acids lying far from the retinal binding site. The other models, i.e. those of human cone opsins (based on bovine rhodopsin) and of mouse melanopsin (based on squid rhodopsin) were achieved by a high degree of model refinement upon randomizing all the Cartesian coordinates of standard residues in the initial model, which produced multiple models from the same alignment (i.e. 250 for each cone opsin and 100 for mouse melanopsin). For each run, the top twenty models, characterized by the lowest values of the MODELLER objective function (which means lowest degree of restraint violation) were subjected to quality checks, which verified the correctness of main chain conformation, leading to selection of one or more models. For each run, the top twenty models were selected, characterized by the lowest values of the MODELLER objective function (which means lowest degree of restraint violation). The set of selected models were subjected to quality checks, which verified the correctness of main chain conformation, leading

to selection of one or more models.

For all modeled opsins, side chains were subjected to automatic adjustment if in non-allowed conformation by using three different backbone-independent and backbone-dependent rotamer libraries. Care was put in keeping as much as possible the conformation of conserved amino acids in the template retinal binding site. Water molecules in conserved amino acid environments were transferred from the template structure to the final model(s) of the target protein.

Table S5: Main features of the comparative models

| Code                 | Protein             | Template PDB        | Chain          | % Identity <sup>a</sup> | N. Water <sup>b</sup> |
|----------------------|---------------------|---------------------|----------------|-------------------------|-----------------------|
| AARh                 | Ancestral Archosaur | 1U19 <sup>S10</sup> | A              | 93                      | 21                    |
| Bcone                | Blue Cone opsin     | 1U19 <sup>S10</sup> | A              | 44                      | 14                    |
| Gcone                | Green Cone opsin    | 1U19 <sup>S10</sup> | A              | 41                      | 10                    |
| Rcone                | Red Cone opsin      | 1U19 <sup>S10</sup> | A              | 40                      | 10                    |
| mMeOp                | Mouse melanopsin    | 2Z73 <sup>S11</sup> | A              | 45                      | 8                     |
| PoXeR <sub>13C</sub> | Sensory rhodopsin   | 4TL3 <sup>?</sup>   | B <sup>c</sup> | 51                      | 5                     |
| PoXeR <sub>AT</sub>  | Sensory rhodopsin   | 4TL3 <sup>?</sup>   | B <sup>c</sup> | 51                      | 5                     |

<sup>a</sup>Percentage of sequence identity computed as a ratio between the number of aligned positions.

<sup>b</sup>Number of water molecules translated from the template to the target structures as topologically equivalent.

<sup>c</sup>For PoXeR<sub>13</sub> and PoXeR<sub>AT</sub> we selected chain B, rather chain A, because is slightly more complete.

## S8 Further details on the assignment of ionizable residues protonation state

As reported in the main text at the end of Section 2.2.3, PROPKA data may not always give a realistic (*i.e.*, conforming to available experimental data or current consensus) results. This is mostly felt with regard to histidines, which show a  $pK_a$  value often close to the imposed pH, and thus, it is often unclear which is their actual protonation state. Taking a leaf from the previous ARM work,<sup>S1</sup> we decided to modulate the assignment of the protonation state to ionizable residues as follows. Doing so, we were able to obtain protonation states more in line with currently accepted data.<sup>S1</sup>

Concerning Asp, Glu, Arg and Lys residues, we followed the indication given by the computed charge (as reported in Equation 5), as long as the residue's corresponding buried percentage was higher than 55%. For His residues, we applied the further condition that the computed shift value ( $\Delta pK_a$ ) is higher than 1.6 pH units.

Nevertheless, we would like to stress once more the importance of employing the correct protonation state for ionizable residues, and to follow the available experimental data whenever it is possible, as illustrated in Sections 3.2 and, particularly, 3.2.4.

## S9 Notes

Figures of molecular structures were generated with PyMOL (<http://www.pymol.org>)

## References

- (S1) Melaccio, F.; del Carmen Marín, M.; Valentini, A.; Montisci, F.; Rinaldi, S.; Cherubini, M.; Yang, X.; Kato, Y.; Stenrup, M.; Orozco-González, Y.; Ferre, N.; Luk, H. L.; Kandori, H.; Olivucci, M. Toward Automatic Rhodopsin Modeling as a Tool for High-Throughput Computational Photobiology. *JCTC* **2016**, *12*, 6020–6034.
- (S2) Vogeley, L.; Sineshchekov, O. A.; Trivedi, V. D.; Sasaki, J.; Spudich, J. L.; Luecke, H. Anabaena Sensory Rhodopsin: A Photochromic Color Sensor at 2.0 Å. *Science* **2004**, *306*, 1390–1393.
- (S3) Tian, W.; Chen, C.; Lei, X.; Zhao, J.; Liang, J. CASTp 3.0: Computed Atlas of Surface Topography of Proteins. *Nucleic Acids Res* **2018**, *46*, W363–W367.
- (S4) Olsson, M. H.; Søndergaard, C. R.; Rostkowski, M.; Jensen, J. H. PROPKA3: Consistent Treatment of Internal and Surface Residues in Empirical  $pK_a$  Predictions. *J. Chem. Theory Comput.* **2011**, *7*, 525–537.
- (S5) Nogly, P.; Weinert, T.; James, D.; Carbajo, S.; Ozerov, D.; Furrer, A.; Gashi, D.; Borin, V.; Skopintsev, P.; Jaeger, K.; Nass, K.; Bath, P.; Bosman, R.; Koglin, J.; Seaberg, M.; Lane, T.; Kekilli, D.; Brnle, S.; Tanaka, T.; Wu, W.; Milne, C.; White, T.; Barty, A.; Weierstall, U.; Panneels, V.; Nango, E.; Iwata, S.; Hunter, M.; Schapiro, I.; Schertler, G.; Neutze, R.; Standfuss, J. Retinal Isomerization in Bacteriorhodopsin Captured by a Femtosecond X-Ray Laser. *Science* **2018**, eaat0094.
- (S6) Nishikawa, T.; Murakami, M.; Kouyama, T. Crystal Structure of the 13-*cis* Isomer of Bacteriorhodopsin in the Dark-Adapted State. *J. Mol. Biol.* **2005**, *352*, 319–328.
- (S7) Nakamichi, H.; Okada, T. Crystallographic Analysis of Primary Visual Photochemistry. *Angew. Chem.* **2006**, *118*, 4376–4379.
- (S8) Ran, T.; Ozorowski, G.; Gao, Y.; Sineshchekov, O. A.; Wang, W.; Spudich, J. L.;

- Luecke, H. Cross-Protomer Interaction with the Photoactive Site in Oligomeric Proterhodopsin Complexes. *Acta Crystallogr. D* **2013**, *69*, 1965–1980.
- (S9) Kato, H. E.; Zhang, F.; Yizhar, O.; Ramakrishnan, C.; Nishizawa, T.; Hirata, K.; Ito, J.; Aita, Y.; Tsukazaki, T.; Hayashi, S.; Hegemann, P.; Maturana, A. D.; Ishitani, R.; Deisseroth, K.; Nureki, O. Crystal structure of the channelrhodopsin light-gated cation channel. *Nature* **2012**, *482*, 369.
- (S10) Okada, T.; Sugihara, M.; Bondar, A. N.; Elstner, M.; Entel, P.; Buss, V. The Retinal Conformation and its Environment in Rhodopsin in Light of a New 2.2 Å crystal structure. *J. Mol. Biol.* **2004**, *342*, 571–583.
- (S11) Murakami, M.; Kouyama, T. Crystal Structure of Squid Rhodopsin. *Nature* **2008**, *453*, 363–367.
- (S12) Dong, B.; Sánchez-Magraner, L.; Luecke, H. Structure of an Inward Proton-Transporting Anabaena Sensory Rhodopsin Mutant: Mechanistic Insights. *Biophys. J.* **2016**, *111*, 963–972.
- (S13) Enami, N.; Yoshimura, K.; Murakami, M.; Okumura, H.; Ihara, K.; Kouyama, T. Crystal Structures of Archaeorhodopsin-1 and -2: Common Structural Motif in Archaeal Light-driven Proton Pumps. *J. Mol. Biol.* **2006**, *358*, 675–685.
- (S14) Kouyama, T.; Fujii, R.; Kanada, S.; Nakanishi, T.; Chan, S. K.; Murakami, M. Structure of Archaeorhodopsin-2 at 1.8 Å Resolution. *Acta Crystallogr. D* **2014**, *70*, 2692–2701.
- (S15) Volkov, O.; Kovalev, K.; Polovinkin, V.; Borshchevskiy, V.; Bamann, C.; Astashkin, R.; Marin, E.; Popov, A.; Balandin, T.; Willbold, D.; Büldt, G.; Bamberg, E.; Gordeliy, V. Structural insights into ion conduction by channelrhodopsin 2. *Science* **2017**, *358*, eaan8862.
- (S16) Kato, H. E.; Inoue, K.; Abe-Yoshizumi, R.; Kato, Y.; Ono, H.; Konno, M.; Hososhima, S.; Ishizuka, T.; Hoque, M. R.; Kunitomo, H.; Ito, J.; Yoshizawa, S.; Yamashita, K.; Take-

- moto, M.; Nishizawa, T.; Taniguchi, R.; Kogure, K.; Maturana, A. D.; Iino, Y.; Yawo, H.; Ishitani, R.; Kandori, H.; Nureki, O. Structural Basis for Na<sup>+</sup> Transport Mechanism by a Light-Driven Na<sup>+</sup> Pump. *Nature* **2015**, *521*, 48–53.
- (S17) Hosaka, T.; Yoshizawa, S.; Nakajima, Y.; Ohsawa, N.; Hato, M.; DeLong, E. F.; Kogure, K.; Yokoyama, S.; Kimura-Someya, T.; Iwasaki, W.; Shirouzu, M. Structural Mechanism for Light-Driven Transport by a New Type of Chloride Ion Pump, *Nonlabens marinus* Rhodopsin-3. *J. Biol. Chem.* **2016**, *291*, 17488–17495.
- (S18) Kim, K.; Kwon, S.-K.; Jun, S.-H.; Cha, J. S.; Kim, H.; Lee, W.; Kim, J. F.; Cho, H.-S. Crystal Structure and Functional Characterization of a Light-Driven Chloride Pump Having an NTQ Motif. *Nat. Commun.* **2016**, *7*, 12677–12687.
- (S19) Luecke, H.; Schobert, B.; Lanyi, J. K.; Spudich, E. N.; Spudich, J. L. Crystal Structure of Sensory Rhodopsin II at 2.4 Angstroms: Insights Into Color Tuning and Transducer Interaction. *Science* **2001**, *293*, 1499–1503.
- (S20) Murakami, M.; Kouyama, T. Crystallographic Analysis of the Primary Photochemical Reaction of Squid Rhodopsin. *J. Mol. Biol.* **2011**, *413*, 615–627.
